# Supplementary material
Source: PubMed Central journal article supplement (PMC5788258)
Supplement: NIHMS75731-supplement-Supplementary_Materials.pdf [file NIHMS75731-supplement-Supplementary_Materials.pdf]

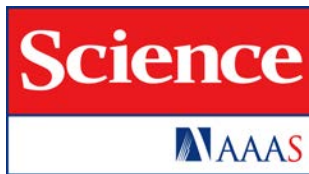

## Supplementary Materials for

Transferrin receptor 1 is a reticulocyte-specific receptor for *Plasmodium vivax*

Jakub Gruszczyk, Usheer Kanjee, Li-Jin Chan, Sébastien Menant, Benoit Malleret, Nicholas T.Y. Lim, Christoph Q. Schmidt, Yee-Foong Mok, Kai-Min Lin, Richard D. Pearson, Gabriel Rangel, Brian J. Smith, Melissa J. Call, Michael P. Weekes, Michael D. W. Griffin, James M. Murphy, Jonathan Abraham, Kanlaya Sriprawat, Maria J. Menezes, Marcelo U. Ferreira, Bruce Russell, Laurent Renia, Manoj T. Duraisingh, Wai-Hong Tham\*

\*Corresponding author: [tham@wehi.edu.au](mailto:tham@wehi.edu.au)

### **This PDF file includes:**

Materials and Methods  
Figs. S1 to S12  
Tables S1 to S6  
References (41-83)

### **Other Supplementary Material for this manuscript includes the following:**

Dataset S1 as a separate Excel file

## Materials and Methods

### PvRBP2b cloning and sequencing

Sequence of PvRBP2b from *P. vivax* strain *Salvador I* was obtained from PlasmoDB Database ([www.plasmodb.org](http://www.plasmodb.org); accession number: PVX\_094255, total length 2,806 amino acids). Synthetic DNA was codon-optimized for expression in *E. coli* (Life Technologies). The sequence encompassing amino acids 161 to 1,454 of PvRBP2b was cloned into pMA-RQ (ampR) vector. Restriction free cloning was used to generate shorter fragments of the protein following a protocol described before (41). PvRBP2b sequence including residues 161 to 969 and 161 to 1,454 as well as the corresponding truncations: 474 to 969 and 474 to 1,454, were cloned into modified version of pET-32a(+) vector (Novagen) yielding constructs PvRBP2b<sub>161-969</sub>, PvRBP2b<sub>161-1454</sub>, PvRBP2b<sub>474-969</sub> and PvRBP2b<sub>474-1454</sub>, respectively. These constructs allowed the expression of PvRBP2b proteins fused with bacterial thioredoxin, 6xHis-tag and tobacco etch virus (TEV) protease cleavage site at their N-termini. The TEV protease cleavage site enables removal of both tags. The construct used for crystallization, PvRBP2b<sub>169-470</sub> as well as PvRBP2b<sub>169-652</sub> and PvRBP2b<sub>169-813</sub> were cloned into pPROEX HTb vector and included N-terminal 6xHis-tag followed by a TEV cleavage site. All selected clones had their sequences verified at the Melbourne Translational Genomics Platform (MTGP). The list of all primer sequences used in this study is presented in Table S3 and a schematic representation of all PvRBP2b constructs is shown in Figure 2F.

### Expression and purification of different variants of PvRBP2b

PvRBP2b<sub>169-470</sub> was expressed using *E. coli* strain SHuffle® T7 (New England Biolabs) and Terrific Broth (TB) supplemented with 100 µg/ml of carbenicillin. Flasks containing 1 liter of medium were incubated in Multitron shaker (Infors HT) at 37°C at 200 rpm. At OD<sub>600</sub> of around 1.0, IPTG (Astral) was added to the final concentration of 1.0 mM and protein expression was allowed to continue for 20 hours at 16°C. Cells were harvested by centrifugation at 6,000 x g, resuspended in freezing buffer containing 50 mM TrisHCl pH 7.5, 500 mM NaCl, 10% (v/v) glycerol supplemented with cComplete EDTA-free protease inhibitor cocktail (Roche), flash-frozen in liquid nitrogen and stored at -80°C until further processing.

For the purification cell pellet was thawed on ice and resuspended in the freezing buffer supplemented with 0.5 mg/ml of DNase and 1.0 mg/ml of lysozyme (both from Sigma-Aldrich). Cells were lysed using sonicator Sonopuls UW 3200 (Bandelin) equipped with VS 70 T probe. The obtained crude cell extract was clarified by centrifugation at 30,000 x g for 45 minutes at 4°C. The supernatant was applied on the 5 ml HisTrap column (GE Healthcare) pre-equilibrated with the freezing buffer. The unbound material was washed away using at least 10 column volumes of the washing buffer: 50 mM TrisHCl pH 7.5, 500 mM NaCl, 10% (v/v) glycerol and 10 mM imidazole. The bound protein was eluted from the column using the same buffer but containing 300 mM imidazole instead. The eluted fractions were pooled and dialyzed overnight in the presence of TEV protease into the buffer containing 20 mM NaHEPES pH 7.0 and 100 mM NaCl. The resulting protein sample was applied on the 5 ml SP-Sepharose HiTrap column (GE Healthcare) pre-equilibrated with the dialysis buffer. Unbound material was washed away using at least 10 column volumes of the buffer. The

protein was eluted from the column using the gradient of 20 mM NaHEPES pH 7.0 and 1.0 M NaCl. Collected fractions were analyzed on SDS PAGE and those containing the protein of interest were concentrated using Vivaspin 15 Turbo centrifugal concentrators (Sartorius) with a 5 kDa molecular weight cut-off and injected onto S75 Superdex 16/600 size exclusion column (GE Healthcare) pre-equilibrated with 20 mM NaHEPES pH 7.5 and 200 mM NaCl. The monodisperse peak fractions containing protein were pooled and concentrated using the same type of concentrator and used directly without freezing for the crystallization trials.

Expression and purification of two longer variants of PvRBP2b, PvRBP2b<sub>161-969</sub>, PvRBP2b<sub>161-1454</sub> as well as truncations, PvRBP2b<sub>169-652</sub>, PvRBP2b<sub>169-813</sub>, PvRBP2b<sub>474-969</sub> and PvRBP2b<sub>474-1454</sub> were performed in a similar manner as described above or previously (18, 42).

#### Cloning, expression and purification of recombinant PvRBPs

Proteins included in this study were PvRBP1a (amino acids [aa] 160–1,170), PvRBP1b (aa 140–1,275), PvRBP2a (aa 160–1,135), PvRBP2b (aa 161–1,454), PvRBP2cNB (aa 501–1,300) and PvRBP2-P2 (aa 161–641) Their expression and purification have been described previously (18, 19, 42).

#### Expression and purification of human transferrin receptor 1

A construct encoding the soluble ectodomain of human transferrin receptor 1 (TfR1, residues 121 to 760) was obtained from Addgene (pAcGP67A-TfR, Plasmid #12130, (43)). The TfR1 sequence follows a gene segment encoding the leader peptide from the baculovirus protein GP67, a 6xHis-tag, and a factor Xa cleavage site in a modified form of the pAcGP67A expression vector (PharMingen) as described before (43). TfR1 was expressed in a lytic baculovirus/insect cell expression system using Sf21 cells (Life Technologies) and Insect-XPRESS™ Protein-free Insect Cell Medium supplemented with L-glutamine (Lonza). Protein expression was induced by inoculation of the cell culture at around  $1 \times 10^6$  cells/ml with the third passage stock (P3) of virus and typically allowed to progress for three days. Media supernatant was separated from the cells by centrifugation at  $2,000 \times g$  for 20 min and concentrated until around 10% (v/v) of their initial volume using tangential flow filtration device equipped in a cassette with 10 kDa molecular weight cut-off (Millipore).

Concentrated supernatants were subsequently dialyzed into a buffer containing 20 mM TrisHCl pH 7.5 and 300 mM NaCl in order to remove the residuals of the culture media that might interfere with the subsequent steps of purification. After dialysis, protein was captured from the solution using Ni-NTA chromatography. The dialyzed sample was loaded onto 5 ml HisTrap column (GE Healthcare) pre-equilibrated with the dialysis buffer. Unbound material was washed away with at least 10 column volumes of the same buffer supplemented with 20 mM imidazole. Protein was eluted from the column with 300 mM imidazole in the dialysis buffer. Obtained sample was concentrated using Vivaspin 15 Turbo centrifugal concentrators (Sartorius) with a 5 kDa molecular weight cut-off and injected onto S200 Superdex 16/600 size exclusion column (GE Healthcare) pre-equilibrated with a buffer containing 20 mM NaHEPES pH 7.5, 100 mM NaCl and 50 mM NaHCO<sub>3</sub>. The final samples were supplemented with 10% (v/v) glycerol, flash-frozen in liquid nitrogen and stored at -80°C.

### Expression and purification of TfR1 mutant $\Delta$ G217

Synthetic DNA corresponding to the sequence of human TfR1 (residues 121 to 760) and harboring a Gly217 deletion was ordered from Life Technologies. The gene was multiplied using PCR and primers introducing BamHI and NotI restriction sites on its ends. The PCR product was digested with the corresponding restriction enzymes and ligated into pAcGP67A vector previously digested with the same enzymes. The sequence of the obtained clone was verified using Melbourne Translational Genomics Platform. The sequence of the obtained clone was identical with the wild-type except the introduced  $\Delta$ G217 mutation. Expression and purification of the mutant protein were performed as described above for the wild-type TfR1 protein.

### Purification of human transferrin

Apo-transferrin purified from human serum was purchased from Sigma-Aldrich (Catalog Number T4382). The protein powder was resuspended in a buffer containing 100 mM disodium carbonate at pH 5.9. Loading of transferrin with iron was performed as described in the manufacturer's leaflet by adding a solution of ferrous ammonium sulfate, hexahydrate (Sigma-Aldrich) corresponding to 2% (w/w) of protein mass. The sample was incubated with stirring for one hour at room temperature. The pH was then raised to 8.5 using 1.0 M disodium carbonate and the solution was mixed for the additional two hours. Holo-transferrin was subsequently re-purified by gel filtration chromatography using a S200 Superdex 16/600 size exclusion column (GE Healthcare) equilibrated with 20 mM NaHEPES pH 7.5, 100 mM NaCl and 50 mM NaHCO<sub>3</sub> buffer. The final samples were supplemented with 10% (v/v) glycerol, flash-frozen in liquid nitrogen and stored at -80°C.

### MACV GP1 cloning, expression and purification

MACV GP1 (Carvalho strain, residues 87-240) along with an N-terminal 6xHis-tag, a TEV protease site, and a short linker (amino acids SGSG) was subcloned into the pHLsec vector (44). The protein was produced by transfection using linear polyethylenimine in GnTI<sup>-/-</sup> 293S cells grown in suspension and then purified using nickel affinity purification followed by reverse nickel affinity purification and size-exclusion chromatography on a Superdex 200 column.

### Calculation of protein concentration

Molecular weights and extinction coefficients for different variants of PvRBP2b protein were calculated using ProtParam from ExpASY server (<http://web.expasy.org/protparam/>). Molecular weights for transferrin and transferrin receptor 1 were obtained experimentally using Mass Spectrometry (MS) and their extinction coefficients were found in the literature (43, 45). All the values are presented in Table S4.

### TfR1-Tf and PvRBP2b<sub>161-969</sub>-TfR1-Tf complex formation

The binary complex between Tf and TfR1 was created by mixing equimolar amounts of proteins and incubating them overnight at 4°C. The complex was subsequently re-purified by gel filtration chromatography using a S200 Superdex 16/600 size exclusion column (GE Healthcare) equilibrated with 20 mM NaHEPES pH 7.5, 100

mM NaCl and 50 mM NaHCO<sub>3</sub> buffer. The ternary complex between PvRBP2b<sub>161-969</sub> and TfR1-Tf was created in an analogical way.

### Antibodies

Anti-PvRBP polyclonal antibodies production was performed at the Walter and Eliza Hall Institute Monoclonal Antibody Facility (19). Rabbits were immunized five times with 150 µg of PvRBP2b<sub>161-1454</sub>. The first immunization was administered with Complete Freund's adjuvant and the rest with Incomplete Freund's Adjuvant. Rabbit IgG were purified from serum using Protein G sepharose.

All anti-PvRBP mAbs were produced at the Monoclonal Antibody Facility at the Walter and Eliza Hall Institute. BALB/c and C57Bl6 mice received three immunizations of recombinant PvRBP2b<sub>161-1454</sub>. At day 0, Complete Freund's adjuvant was mixed with the antigen into an emulsion and injected intra-peritoneally. At day 30, and day 60, the antigen was mixed with incomplete Freund's adjuvant, and the emulsion injected intra-peritoneally. Serum ELISA titrations were performed at day 72. The mouse with the best response received a final injection of antigen in saline, and splenocytes were harvested three days later. Spleen cells were fused with SP2/0 myeloma cells to form B-cell-myeloma fused cells (hybridomas). Hybridomas were grown in hypoxanthine-aminopterin thymidine growth medium. ELISA was used to select hybridomas producing antibodies specific to the immunized antigen. Hybridomas were cloned by limiting dilution in multi-well plates aiming for one cell or less per well. The sub-cloning supernatants were screened by ELISA. Two or more rounds of limiting dilution cloning were generally required before the hybridomas were deemed monoclonal. The antibodies were purified from monoclonal hybridoma supernatants with protein A sepharose.

Anti-TfR1 antibodies were obtained from the following suppliers: MEM-75 (ab9179), 2B6 (ab38168), 23D10 (ab10251), LT71 (ab38446) and 13E4 (ab38171) from Abcam, OKT9 from Stemcell Technologies (60106), L01.1 (347510) and M-A712 (555534) from BD Biosciences. For surface staining in Fig. 4A and Fig. S1A, we used the following antibodies anti-TfR1/CD71-APC (M-A712, 1:20, BD Pharmigen 551374), anti-CR1/CD35-Alexa647 (E11, 1:100, BD Pharmigen 565329), GlyA-PE-Cy5 (JC159, 1:1000, Abcam ab201309), anti-Basigin/CD147-APC (VJI/9, 1:20, Abcam ab91150), anti-DARC/CD234-APC (*REA376*, 1:100, Miltenyi Biotec 130105684) and anti-DAF/CD55-PE-Cy5 (143-30, 1:100, Abcam ab25410).

### Reticulocyte enrichment for flow cytometry-based red blood binding

500 ml of whole blood (Australian Red Cross) was passed through a RC high efficiency leucocyte removal filter (Haemonetics Australia) and washed three times with phosphate-buffered saline buffer (PBS) at 2,000 *x* g for five minutes to remove the serum component. Red blood cells were adjusted to approximately 50% haematocrit with PBS and 5.5 ml was carefully layered on 6 ml of 70% (v/v) isotonic Percoll cushion (GE Healthcare). After centrifugation at 2,000 *x* g for 25 minutes, a thin band of enriched reticulocytes at the Percoll interface was collected. Reticulocytes were stored in RPMI wash buffer (Gibco) at 4°C until further usage.

### Enzymatic treatment of red blood cells

Red blood cells were treated with trypsin (Sigma-Aldrich), chymotrypsin (Worthington) and neuraminidase (Sigma-Aldrich). 480  $\mu$ l of packed blood was washed with 12 ml of wash buffer (RPMI HEPES medium with 25 mM NaHCO<sub>3</sub>), spun down at 2,000  $\times$  g for one minute and resuspended in 12 ml of wash buffer. 2 ml of the resuspension was used for each sample (i.e. untreated, high trypsin, low trypsin, chymotrypsin and neuraminidase). Samples were spun down at 2,000  $\times$  g for 1 minute and the wash buffer was removed. Packed blood (~80  $\mu$ l) was treated with 2 ml of the various enzymes at the following concentrations, high trypsin (1 mg/ml), low trypsin (0.1 mg/ml), chymotrypsin (1 mg/ml) and neuraminidase (0.07 U/ml). Samples were incubated at 37°C for 1 hour and washed with 4 ml of wash buffer. Wash buffer was replaced with 1 ml of chymotrypsin/trypsin inhibitor (Worthington) at 1 mg/ml and incubated for 10 minutes. Samples were washed and stored in 4 ml of wash buffer at 4°C.

### Flow cytometry-based red blood cell binding assay

Reticulocyte preparations were resuspended in PBS to a final a final volume of 1  $\times$  10<sup>7</sup> cells/ml. Recombinant proteins were incubated at 0.01 mg/ml in 100  $\mu$ l of the resuspended reticulocyte population for an hour at room temperature. All washes were performed in PBS supplemented with 1% (w/v) bovine serum albumin (BSA) and spun at 4,000  $\times$  g for 1 minute and all antibody incubations were performed at room temperature for one hour. The binding assays were washed once and incubated with the respective rabbit polyclonal antibodies (12.5  $\mu$ g/ml). After washing, Alexa Fluor 647 chicken anti-rabbit secondary antibody (1:100; Life Technologies) was added. After a final wash, 100  $\mu$ l thiazole orange (TO) (Retic-Count Reagent; BD Biosciences) was added and incubated for half an hour. The TO stain was removed and red blood cells were resuspended in 200  $\mu$ l PBS and analysed on the FACSCalibur flow cytometer (BD Biosciences). 50,000 events were recorded and results were analysed using FlowJo software (Three Star). The background signal from a rabbit polyclonal antibody and Alexa Fluor 647 conjugated antibody control (without protein) was subtracted from all binding results. To enable comparison between biological repeats, percentage binding of the protein in the presence of inhibitors/mAbs was divided by the percentage binding with no inhibitor/no mAbs and multiplied by 100 to get the percentage binding relative to the no inhibitor control. For our inhibition studies, anti-TfR1 antibodies were added at 0.05 mg/ml, MACV GP1 at 0.5 mg/ml and CCP 1-3 at 0.3 mg/ml.

### Immunoprecipitation experiments

Immunoprecipitation assays were performed using 0.25 mg/ml of both PvRBP2b<sub>161-1454</sub> and TfR1-Tf complex and 0.05 mg/ml of anti-PvRBP2b mAb in 100  $\mu$ l reaction volume in PBS. After one hour incubation at 4°C on rollers, 10  $\mu$ l of packed Protein G-sepharose beads was added to bind anti-PvRBP2b mAbs and incubated overnight at 4°C on rollers. Beads were washed three times in PBS and spun down at 2,000  $\times$  g for two minutes. Anti-PvRBP2b mAbs and associated proteins were eluted from beads by boiling for five minutes in 2x SDS-PAGE reducing sample buffer and analysed on 4-12% Bis-Tris gels (Invitrogen). Protein bands were visualized by staining with SimplyBlue SafeStain (Life Technologies).

### Fluorescence resonance energy transfer (FRET) assay

PvRBP2b<sub>161-1454</sub> and TfR1 were labelled with N-hydroxysuccinimide ester-activated DyLight 488 (DL488) and DyLight 594 (DL594) (Life Technologies) respectively. The dyes were dissolved in dimethyl sulfoxide (DMSO) (Sigma) and added at five-fold molar excess to the protein being labelled. After one hour incubation at room temperature, unconjugated dye removed using a Micro Bio-Spin P-6 column (BioRad) at 1,000  $\times$  g for two minutes. Average dye per protein was  $\sim$ 3.5 dye/protein for PvRBP2b<sub>161-1454</sub> and  $\sim$ 1.8 dye/protein for TfR1. PvRBP2b<sub>161-1454</sub>-DL488, TfR1-DL594 and Tf were mixed in a 1:1:1 molar ratio with excess of candidate inhibitor in a final 10  $\mu$ l of reaction volume in FRET buffer read in 384-well plates (Corning). One  $\mu$ l of 1% (w/v) SDS was added to one well to measure background signal. Fluorescence intensity was measured using EnVision plate reader (PerkinElmer Life Sciences). DL488 (donor) fluorescence was measured with a 485/14-nm excitation filter and 535/25-nm emission filter and DL594 (acceptor) fluorescence was measured with a 590/20-nm excitation filter and 615/9-nm emission filter. Sensitized emission was measured with a 485/14-nm excitation filter and 615/9-nm emission filter.

### Generation of TfR1 mutant JK-1 cells

The erythroleukemia cell line JK1 was used to generate CRISPR/Cas9-based deletions of *TFRC* (46). Briefly, JK1 cells were maintained in an undifferentiated state in JK1 growth media: Iscove's Modified Dulbecco's Medium (IMDM) with Glutamax (ThermoFisher), 0.5% (v/v) penicillin/streptomycin (ThermoFisher), 10% AB+ octoplasLG (OctoPharma), 2 IU/ml heparin (Affymetrix) and 10  $\mu$ M tranylecypromine (Cayman Chemicals). Cells were transduced with a lentivirus containing the Cas9 expression plasmid LentiCas9-Blast (47) and selected for with 6  $\mu$ g/ml blasticidin (Sigma-Aldrich) to produce JK-1-Cas9. GuideRNAs (sgRNAs) targeting *TFRC* were identified using the Broad Institute Genetic Perturbation Platform sgRNA designer tool (48) and the four top gRNAs were selected: TFRC-g1 (Broad ID: TFRC\_196074043\_s) 5'-CAGGAACCGAGTCTCCAGTG; TFRC-g2 (Broad ID: TFRC\_196072124\_s) 5'-AAATTCATATGTCCCTCGTG; TFRC-g3 (Broad ID: TFRC\_196071432\_as) 5'-GGGGGTTATGTGGCGTATAG; TFRC-g4 (Broad ID: TFRC\_196068088\_s) 5'-AATTGGTGTGTTGATATACA. The sgRNA sequences were cloned into LentiGuide-Puro (47) following which lentivirus containing the vector was produced (49). The lentivirus was transduced into the JK-1-Cas9 line and the cells were selected on both blasticidin and 2  $\mu$ g/ml puromycin (Sigma-Aldrich).

Expression of TfR1 on the transduced cells was monitored by flow cytometry using a Milteny MACSQuant instrument with 405 nm, 488 nm and 638 nm lasers (Miltenyi Biotec), following staining with a 1 in 20 dilution of  $\alpha$ -TfR1-APC (Miltenyi Biotec, San Diego, CA) for 30 minutes at room temperature in PBS + 0.5% BSA. Within 2-3 weeks post transduction, a TfR1-negative population was observed only with the TFRC-g3 sgRNA. Single cell clones were obtained by limiting dilution and the CRISPR/Cas9 target region was PCR amplified using the following primers: TFRC-g3-F 5'-GGTAAATTTCCCTCAAGCCAAA and TFRC-g3-RC 5'-CAGGACATGGGGAAAGTGAT. The size and location of the indel was determined by Tracking of Indels by Decomposition (TIDE) analysis (50). Two clones (TfR1 mut1 and TfR1 mut 2) were used for subsequent experiments.

### Induction of jkRBCs for TfR1 binding studies

Wild-type and mutant (TfR1 mut1 and TfR1 mut2) cell lines were induced to differentiate using epigenetic factor PFI-1. Briefly, cells were expanded in JK-1 growth media and to start induction cells were washed and resuspended in JK1 differentiation media: Iscove's Modified Dulbecco's Medium (IMDM) with Glutamax (ThermoFisher), 0.5% (v/v) penicillin/streptomycin (ThermoFisher), 10% AB+ octoplasLG (OctoPharma), 2 IU/ml heparin (Affymetrix), 330 µg/ml human holotransferrin (Scipac) and 2 µM PFI-1 (Cayman Chemicals). Cells were differentiated for between 12-14 days and media changes were made every 4-5 days. Differentiation into jkRBCs was validated by staining for GypA with a 1 in 100 α-GypA-FITC (StemCell Technologies) and BSG with 1 in 100 α-BSG-FITC (Thermo Fisher Scientific, USA), followed by flow cytometry. Cytospins were prepared as described (51).

### Quantitative surface proteomics

We adapted our previously described method (51, 52). Briefly,  $2 \times 10^7$  of each cell type were washed with PBS and then surface sialic acid residues were chemically biotinylated following oxidation with sodium meta-periodate (Thermo) and reaction with aminoxy-biotin (Biotium). After quenching the reaction with 5 mM glycerol in PBS (Sigma-Aldrich), cells were incubated in Triton X-100 lysis buffer. Streptavidin agarose beads (Pierce) were used to enrich for biotinylated glycoproteins, and after extensive washing, the captured proteins were denatured with dithiothreitol (Sigma-Aldrich), alkylated with iodoacetamide (IAA, Sigma) and digested on-bead with trypsin (Promega) in 200 mM sodium HEPES pH 8.5 for 3 hours. The tryptic peptides were recovered and labeled with tandem mass tag (TMT) reagents (52). Following quenching with hydroxylamine, the TMT-labeled samples were combined in a 1:1:1:1 ratio, enriched and desalted and then 75% of the total sample was separated into 6 fractions using tip-based strong cation exchange columns (52). Of the remaining 25% of the total sample, a portion (10% of total sample) was subject to mass spectrometry unfractionated.

Mass spectrometry data was acquired using an Orbitrap Fusion coupled with a UltiMate 3000 Nano LC (Thermo Fisher Scientific). Peptides were separated using a 90 min linear gradient of 3 to 33% (v/v) acetonitrile in 0.1% formic acid at a flow rate of 200 nl/min (fractionated samples) or a 180 min gradient with otherwise identical parameters (unfractionated sample), and the separation was done on a 75 cm PepMap C18 column (Thermo Fisher Scientific). Each analysis used a MultiNotch MS3-based TMT method (52, 53). The scan sequence began with an MS1 spectrum (Orbitrap analysis, resolution 120,000, 400-1400 Th, AGC target  $2 \times 10^5$ , maximum injection time 50 ms). MS2 analysis consisted of CID (quadrupole ion trap analysis, AGC 15,000, NCE 35, maximum injection time 120 ms). The top ten precursors were selected for MS3 analysis, in which precursors were fragmented by HCD prior to Orbitrap analysis (NCE 55, max AGC  $2 \times 10^5$ , maximum injection time 150 ms, isolation specificity 0.5 Th, resolution 60,000). A Sequest-based in house software pipeline was used to process mass spectra as previously described (52). The human Uniprot database (April 2014) was used to search for proteins and samples were concatenated with common contaminants (52) and filtered to a final protein-level false discovery rate of 1%. In order to compare signals between different TMT channels, TMT reporter ion counts across all peptide-spectral



matches were summed using in-house software as previously described (52). Poor quality MS3 spectra with a combined signal:noise ratio < 250 across all TMT reporter ions were excluded. For protein quantitation, reverse and contaminant proteins were removed, then each reporter ion channel was summed across all quantified proteins and normalized assuming equal protein loading across all samples. Fold change for each protein was calculated according to (average signal:noise (TfR1 mutants) / average signal:noise (JK-1 controls)). Protein quantitation values were exported for further analysis in Excel. Gene Ontology Cellular Compartment terms were downloaded from [www.uniprot.org](http://www.uniprot.org) and p-values (Significance A) calculated and adjusted with the Benjamini Hochberg method using Perseus version 1.2.0.16 (54).

#### Crystallization of PvRBP2b<sub>169-470</sub>

Crystallization screens were set up at the Collaborative Crystallization Center in Parkville using crystallization robot Phoenix (Art Robbins Instruments) and sitting drop vapor diffusion method in 96-well format plates. 150 nl of protein sample at two different concentrations, 7.5 and 15.0 mg/ml, were mixed with the reservoir in 1:1 ratio. Two different sparse matrix screens were set up covering wide range of different crystallization conditions. Plates were incubated at 20°C and drops were monitored regularly over the period of 3 months. First crystals appeared after 24 hours in the condition containing 20% (w/v) PEG 3,350, 200 mM potassium thiocyanate and 100 mM Bis-Tris pH 7.5. The initial crystal hit was optimized manually using the hanging drop method, 24-well Linbro plates (Hampton Research) and varying pH and PEG concentration. For data collection crystals were cryo-protected in a reservoir solution supplemented with 20% (v/v) glycerol and frozen in liquid nitrogen.

#### X-ray diffraction data collection and structure determination

Diffraction data were collected at MX2 microfocus beamline at the Australian Synchrotron Facility in Clayton at 0.9537 Å wavelength using ADSC Quantum 315r detector. The best crystal diffracted to 1.71 Å resolution and belonged to the primitive monoclinic space group  $P2_1$  with cell dimensions  $a = 59.50$  Å,  $b = 124.20$  Å,  $c = 65.31$  Å,  $\alpha = 90.00^\circ$ ,  $\beta = 97.75^\circ$  and  $\gamma = 90.00^\circ$ . The collected diffraction data were integrated using iMosflm (55). Scaling and merging were performed using program Aimless from the CCP4 package (56). The cell content was analyzed using program Matthews (57). Molecular replacement was attempted using Phaser (58) and PvRBP2a as a model (PDB accession number 4Z8N). The search yielded a definitive solution containing two molecules in the asymmetric unit. The initial model was rebuilt automatically using program AutoBuild (59) followed by a manual improvement using program Coot (60). The structure was refined using the program Phenix Refine (59) and including TLS that were generated using TLSMD web server (61). Multiple cycles of model building and atomic refinement yielded a structure that was eventually refined to 1.71 Å resolution with the final  $R_{\text{work}} = 0.168$  and  $R_{\text{free}} = 0.188$ . The refinement statistics are given in Table S1. The atomic coordinates and structure factors have been deposited in Protein Data Bank with accession number 5W53.

### Analytical size exclusion chromatography (SEC)

Analytical chromatography was performed at room temperature using ÄKTA pure 25 M1 chromatographic system (GE Healthcare). Proteins were separated alone as well as mixed in all possible combinations. In order to facilitate the analysis, proteins were mixed in equimolar ratio and the same amount of given protein was used throughout the experiment. Samples were incubated for 1 hour to allow complex formation and then 100  $\mu$ l were injected onto Superdex 200 Increase 10/300 GL column (GE Healthcare) equilibrated with 20 mM NaHEPES pH 7.5, 100 mM NaCl, 50 mM NaHCO<sub>3</sub> at 0.75 ml/min of buffer flow. The absorbance of the eluent was monitored at 280 nm. The eluate was collected in 0.5 ml fractions. Obtained fractions were analyzed using SDS PAGE. The column was calibrated with high- and mid-mass molecular mass markers (GE Healthcare) as described in the manufacturer's instructions. The results of the calibration are shown in Figure S5.

### Surface plasmon resonance (SPR) data collection, processing and analysis

All experiments were carried out at 25°C using a Reichert SR7500DC SPR instrument (Reichert Technologies, Buffalo, NY) using the integrated SPR autolink software package. Data analysis was performed using the TraceDrawer software package (Ridgeview Instruments AB). The running buffer consisted of 20 mM NaHEPES at pH 7.5 including 100 mM NaCl, 50 mM NaHCO<sub>3</sub> and 0.005% (v/v) Tween 20 and was used for the SPR experiments that probe the interactions with TfR1. To analyze the interactions of TfR1 and TfR1-Tf complexes with PvRBP2b, 4,300 RUs of the fragment PvRBP2b<sub>161-969</sub> or 1,300 RUs of the fragment PvRBP2b<sub>161-1454</sub> were covalently fixed to a carboxymethyl dextran hydrogel biosensor chip (CMD500m, purchased from XanTec Bioanalytics, Duesseldorf, Germany) using standard amine coupling according to the manufacturer's instructions. The reference surface was blank immobilized. To probe binding, a concentration series of TfR1 or TfR1-Tf complexes was injected (as indicated) at 25  $\mu$ l/min for 2 min followed by buffer flow for 5 min and a regeneration step consisting of an injection of 1.0 M NaCl for 30 s. The TfR1 concentration of 7.5 nM or the 7.5:15 nM mixture of the TfR1-Tf complex was injected twice to assess reproducibility. Reference subtracted sensorgrams of two-fold dilution series are shown. For Fig. 3A, 1,300 RUs of PvRBP2b<sub>161-1454</sub> were coupled covalently to a carboxymethyl dextran hydrogel biosensor chip to probe binding of TfR1 and TfR1:Tf complexes. Soluble TfR1 was assayed in a concentration range from 2  $\mu$ M to 7.5 nM, whereas soluble TfR1:Tf complexes were assayed in a range from 2  $\mu$ M:4  $\mu$ M to 1.8 nM:3.9 nM. For Fig. 3B, 4,300 RUs of PvRBP2b<sub>161-969</sub> were coupled covalently to a carboxymethyl dextran hydrogel biosensor chip. Soluble TfR1 binding is shown for a concentration series ranging from 2  $\mu$ M to 7.5 nM and the concentration range of TfR1:Tf complexes range from 2  $\mu$ M:4  $\mu$ M to 7.5 nM:15 nM.

To probe the interaction with anti-PvRBP2b monoclonal antibodies (mAbs) PvRBP2b<sub>161-1454</sub> was immobilised via standard amine coupling onto carboxymethyl dextran sensorchips (CMD500m, Xantec bioanalytics) and 3E9, 6H1 and 10B12 mAbs were flown over the surfaces at the concentrations 40, 52 and 40 nM, respectively. As running buffer, 10 mM NaHEPES pH 7.4 with 150 mM NaCl, and 0.005% (v/v) Tween 20 was used throughout. The antibodies 3E9 and 10B12 were analysed on a single PvRBP2b<sub>161-1454</sub> surface with 10,000 RU of the protein being coated.

Apart for 10B12 extensive buffer flow of up to 12 h in between cycles was sufficient to substantially dissociate the antibody-PvRBP2b complexes. The 6H1 mAb was assayed on another CMD500 chip coated with 1,300 RU of PvRBP2b<sub>161-1454</sub>. The binding curves were fit to a bivalent (2:1) interaction model using the TRACEDRAWER software package to estimate affinity constants for the bivalent interaction. Table S6 summarizes the corresponding kinetic parameters ( $k_a$  and  $k_d$ ), the equilibrium dissociation constants ( $K_{D1}$  and  $K_{D2}$ ) and the  $\chi^2$  values of goodness of the fit.

#### Small angle X-ray scattering (SAXS) data collection, processing and analysis

SAXS data were collected on the SAXS/WAXS beamline at the Australian Synchrotron using the inline size-exclusion chromatography setup and processed as described previously (62). 2D scattering data were radially averaged, normalized to sample transmission and an average of background scattering profiles was subtracted using the ScatterBrain software (written by Stephen Mudie, Australian Synchrotron). The ATSAS suite of software was used for all subsequent SAXS data analyses. For an initial assessment of data quality, Guinier analysis was performed using PRIMUS (63). The program GNOM (64) applied an indirect Fourier transform to the scattering profile to calculate the pair-wise intra-atomic distance distribution function  $P(r)$  and  $D_{max}$ , the maximum dimension of the particle. Theoretical scattering curves were calculated from atomic coordinates and compared with experimental scattering curves by using CRY SOL (65). Low-resolution shape envelope was generated with the *ab initio* bead-modeling program DAMMIF (66), by performing 20 independent reconstructions, aligning all with the most probable model with DAMSEL and DAMSUP, averaging models with DAMAVER and adjusting to correspond with the experimentally determined excluded volume with DAMFILT (67).

The crystal structure of PvRBP2b<sub>169-470</sub> was fitted into the obtained SAXS envelope using rigid-body search and program COLORES (68). The program returned four individual models that were subsequently judged based on the value of the correlation coefficient given for each model as well as the agreement with the available biological information (sequence of the residues constituting the protein fragment and the predicted direction of the polypeptide chain). The results of the superimposition were visualized using PyMOL (69). The data collection and processing statistics are presented in Table S2.

#### Analytical ultracentrifugation (AUC) data collection, processing and analysis

Samples were analysed using an XL-I analytical ultracentrifuge (Beckman Coulter, Fullerton, CA) equipped with an AnTi-60 rotor. Radial absorbance data were acquired at 20°C using a rotor speed of 50,000 rpm (201,600  $\times$  g) and a wavelength of 280 nm, with radial increments of 0.003 cm. The sedimenting boundaries were fitted to a continuous sedimentation coefficient distribution [ $c(s)$ ] model with SEDFIT (70), using a regularization parameter of  $p = 0.95$ , floating frictional ratios, and 250 sedimentation coefficient increments in the range of 0-20 S. The partial specific volumes of proteins, buffer density, and buffer viscosity were calculated using SEDNTERP (71).

### Circular dichroism (CD) data collection, processing and analysis

CD data were collected using circular dichroism spectrometer Model 410 (Aviv Biomedical) and analyzed as described before (18). Before the experiment, protein samples were dialyzed extensively overnight into 20 mM NaHEPES pH 7.5, 100 mM NaCl, 50 mM NaHCO<sub>3</sub> buffer. For the measurements, the protein concentration was set to 3.0 μM. The CD spectra were recorded between 260 and 190 nm with 1 nm wavelength step and 4 s averaging time at 25°C. 120 μl of the protein sample was using quartz cell (Hellma) with the optical path of 0.05 cm. After subtracting the background from the buffer the spectra were processed using DichroWeb server (72, 73). The experimental data were converted to mean residue molar ellipticity ( $\theta$ ). The content of secondary structures was predicted using CDSSTR algorithm (74) and SMP180 reference set (75) for 190-240 nm.

### Secondary structures predictions

Secondary structures predictions for PvRBP2b were performed using JNet Secondary Structure Prediction algorithm integrated into Jalview 2.10.1 (76).

### Population genetic analyses

We downloaded genotype data from <https://www.malariagen.net/data/p-vivax-genome-variation-may-2016-data-release> and extracted variants from the coding region of PvRBP2b using bcftools 1.3.1. We converted the VCF to a diploid VCF (changing 0 and 1 to 0/0 and 1/1 respectively) using sed commands. We calculated nucleotide diversity and Tajima's *D* using scikit-allel 1.1.8. To give the most accurate estimate of true diversity we used all SNPs discovered within the gene, including those that failed variant filters. Code used can be found at [https://github.com/podpearson/PvRBP2b/blob/master/20170803\\_RBP2b\\_diversity\\_for\\_Wai-Hong.ipynb](https://github.com/podpearson/PvRBP2b/blob/master/20170803_RBP2b_diversity_for_Wai-Hong.ipynb)

### Detection of PvRBPs and Pfrh4 by polyclonal and monoclonal antibodies by ELISA

96-well flat-bottomed plates (Maxisorp; Nunc) were coated with 65 nM of recombinant PvRBP1a, PvRBP1b, PvRBP2a, PvRBP2b, PvRBP2cNB, PvRBP2-P2 or Pfrh4 fragments in 100 μl of PBS at 4°C overnight. All washes were done three times using PBS/0.1% Tween and all protein and antibody incubations were performed for one hour at room temperature. Coated plates were washed and blocked with 10% (w/v) skim milk solution (Devondale) for one hour at room temperature. After blocking, primary monoclonal or polyclonal antibodies were added (0.001 μg/μl), washed and subsequently incubated with horseradish peroxidase (HRP)-conjugated rabbit anti-mouse or HRP-conjugated goat anti-rabbit secondary antibody (1:1000 or 1:200 respectively; Fisher Scientific). The primary mAbs were against PvRBP1a (4E3), PvRBP1b (4G4), PvRBP2a (3A11), PvRBP2b (3E9, 6H1, 8G7 and 10B12), PvRBP2cNB (6H2), PvRBP2-P2 (9E3) and Pfrh4 (10C9). Plates were washed twice with PBS/0.1% Tween and a final wash with PBS to remove residual Tween. 100 μl of azino-bis-3-ethylbenzothiazoline-6-sulfonic acid (ABTS liquid substrate; Sigma) was added and incubated in the dark at room temperature for approximately three minutes. 100 μl of 1% (w/v) SDS was used to stop the reaction. Absorbance was read at 405 nm and all samples were performed in duplicate.

### *P. vivax* ex vivo invasion assay

In general, the *ex vivo* assays using Thai and Brazilian isolates were performed by incubating mature parasites with TfR1-positive enriched reticulocytes in either the absence or in the presence of up to 125 µg/ml of anti-PvRBP2b mAbs 3E9, 6H1, 8G7 and 10B12, 125 µg/ml pooled anti-PvRBP2b mAbs (3E9, 6H1 and 10B12; each mAb in the pool was at one third of the final concentration), 125 µg/ml anti-PvRBP2b polyclonal antibody R1527, 125 µg/ml mouse isotype control (ThermoFisher MA1-10407), 125 µg/ml rabbit prebleed IgG (Abcam, ab176094) or 25 µg/ml of a camelid anti-Fy6. For the rabbit polyclonal antibodies, R1527 and the prebleed control were both protein A purified total IgG. Since the camelid anti-Fy6 antibody is a single monovalent VHH domain (15 kDa), it was added at 25 µg/ml to match molar concentration and valency of the other conventional antibodies.

The *ex vivo* invasion assays used in this study for Thai isolates has been described previously (20, 77). Selection of the late developmental stages of *P. vivax* was performed using the magnetic-activated cell sorting (MACS) system (Miltenyi). Mature parasites were mixed with TfR1-positive enriched reticulocytes in either the absence or in the presence of up to 125 µg/ml of anti-PvRBP2b mAbs 3E9, 6H1, 8G7 and 10B12, 125 µg/ml of pooled anti-PvRBP2b mAbs (3E9, 6H1 and 10B12) or 25 µg/ml of a camelid anti-Fy6 antibody. Enriched reticulocytes and mature *P. vivax* schizonts were incubated together for 24 hours, and newly infected red blood cells were determined by microscopy. The Thai clinical samples used in this study were collected from *P. vivax* infected patients and healthy donors for the cord blood attending the clinics of the Shoklo Malaria Research Unit (SMRU), Mae Sot, Thailand, under the following ethical guidelines in the approved protocols; OXTREC 45-09 and OXTREC 17-11 (University of Oxford, Centre for Clinical Vaccinology and Tropical Medicine, UK) and MUTM 2008-215 from the Ethics committee of Faculty of Tropical Medicine, Mahidol University.

For the *ex vivo* assays using Brazilian isolates, TfR1-positive reticulocytes were enriched from packed O+ peripheral blood from Caucasian donors (Valley Biomedical, USA) as described previously with the following modifications (78). Briefly, RBCs were first centrifuged at 4,000  $\times$  g for 2 hours, following which the top 20% of cells were recovered. These cells were layered on a KCl-Percoll gradient (between 1.078 – 1.084 g/ml) and the cells at the interface were recovered and washed multiple times with incomplete RPMI 1640 medium (ThermoFisher, USA). White blood cell contaminants were removed by passing cells through a 45% (v/v) KCl-Percoll gradient, following which the reticulocyte-enriched pellet fraction was recovered and washed with RPMI 1640 medium. Cells were resuspended in Iscove's Modified Dulbecco's Medium (ThermoFisher, USA) and CD71 microbeads (Miltenyi Biotec, USA) were added according to the manufacturer's instructions. Cells and microbeads were incubated with rotation overnight at 4°C. Next the cells were washed to remove excess microbeads and then loaded onto an AutoMACS instrument (Miltenyi Biotec, USA). TfR1-enriched cells were recovered, washed and the proportion of TfR1-positive cells was determined via flow cytometry using anti-TfR1-APC (Miltenyi Biotec, USA). Enrichment was generally > 80% TfR1-positive.

Frozen Brazilian *P. vivax* isolates were thawed and enriched using 1.080 g/ml KCl-Percoll gradients. Parasites were subsequently cultured in Iscove's Modified Dulbecco's Medium (ThermoFisher, USA) supplemented with 10% (v/v) heat-inactivated AB+ human serum and 0.25 mg/ml gentamycin (ThermoFisher, USA) at 37°C in parasite culture gas (94% nitrogen, 5% carbon dioxide, 1% oxygen) for 40 hours. Schizontemia was determined via slide microscopy and the cell density via hemocytometer counting. Schizontemia levels were generally between 0.5 – 1.0%. Invasion assays were set up in half-area 96-well plates (Corning, USA) with  $1.0 \times 10^6$  *P. vivax* donor cells plus  $1.0 \times 10^6$  acceptor cells (either TfR1-positive reticulocytes or JK1 cells) in a total of 100  $\mu$ l of AIM V medium (ThermoFisher, USA) supplemented with 10% (v/v) AB+ human serum and 0.25 mg/ml gentamycin (Sigma-Aldrich, USA). Where appropriate, assays with Brazilian isolates were supplemented in the absence or presence of preservative-free antibodies of 125  $\mu$ g/ml of anti-PvRBP2b mAbs 3E9, 6H1, 8G7 and 10B12, 125  $\mu$ g/ml pooled anti-PvRBP2b antibodies (3E9, 6H1 and 10B12), 125  $\mu$ g/ml anti-PvRBP2b polyclonal antibody R1527, 125  $\mu$ g/ml mouse isotype control (ThermoFisher MA1-10407), 125  $\mu$ g/ml rabbit prebleed IgG (Abcam, ab176094). Invasion was allowed to proceed for ~ 20 hours at which point cytopsins were made (ThermoFisher, USA). Cells were stained either with Hemacolor II stain (Sigma-Aldrich, USA) or May-Grünwald-Giemsa (Sigma-Aldrich, USA) and parasitemia was determined by slide microscopy using a Miller reticle and whole-field counting as described (79). Slides were counted until a minimum of 20 newly-invaded ring-stage parasites had been observed. For each experiment data were collected from between 2 – 3 technical replicates. Study protocols for parasite sample collection in Brazil were approved by the Institutional Review Board of the Institute of Biomedical Sciences, University of São Paulo, Brazil (936/CEP, 2010 and 1169/CEPSH, 2014). Written informed consent was obtained from all patients.

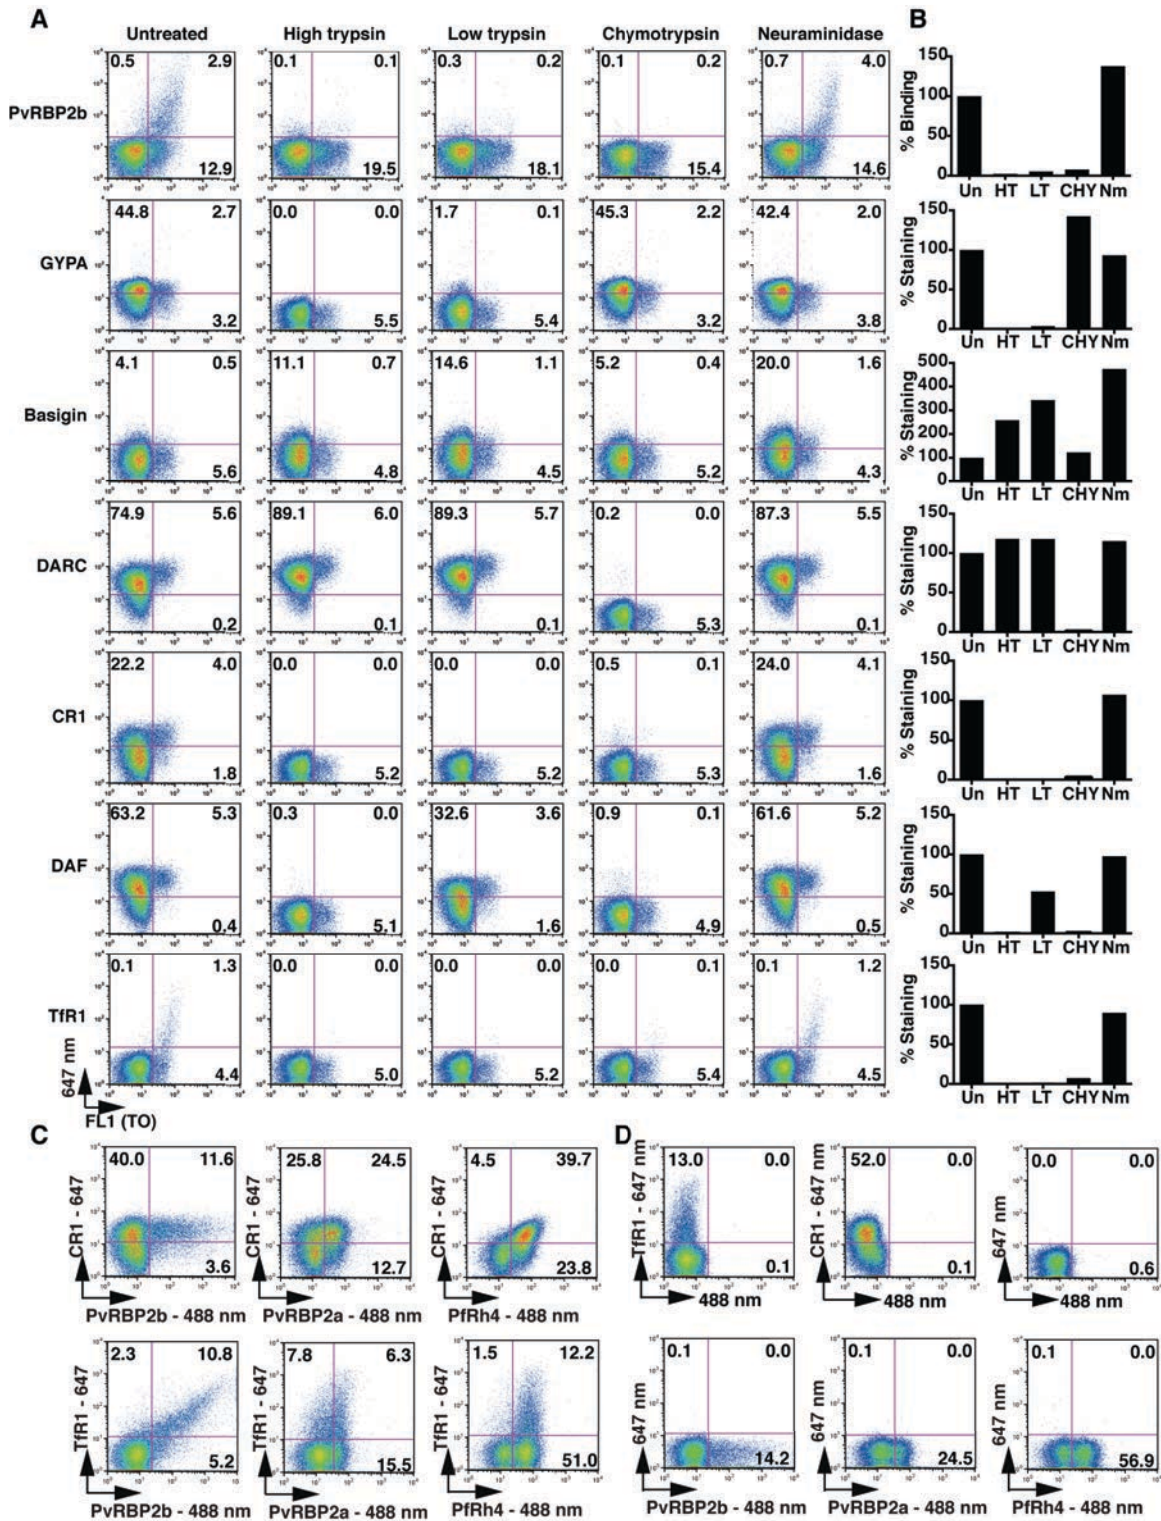

**Figure S1. Flow cytometry-based analysis of PvRBP2b binding and receptor surface expression.** (A) Dot plots of PvRBP2b binding and surface expression for glycoprotein A (GYPA), basigin, DARC, CR1, Decay Accelerating Factor (DAF) and TfR1 were analyzed by flow cytometry on reticulocytes treated with low or high amounts of trypsin (LT or HT), chymotrypsin (CHY) or neuraminidase (Nm). Reticulocytes were stained

with thiazole orange (TO, x-axis). **(B)** Compiled PvRBP2b binding results and surface expression staining. **(C)** Dot plots of PvRBP2b, PvRBP2a and PfRh4 binding together with surface staining for CR1 (top panel) and TfR1 (bottom panel) were analyzed by flow cytometry on reticulocyte-enriched populations. These data show that PfRh4 binding is correlated with CR1 levels and PvRBP2b binding is correlated with TfR1 levels. **(D)** Dot plots of surface receptor expression of TfR1, CR1 and unstained cells (top panels) and reticulocytes with bound PvRBP2b, PvRBP2a and PfRh4 binding alone (bottom panel) were analyzed by flow cytometry on reticulocytes. These data shows no bleed through between the channels.



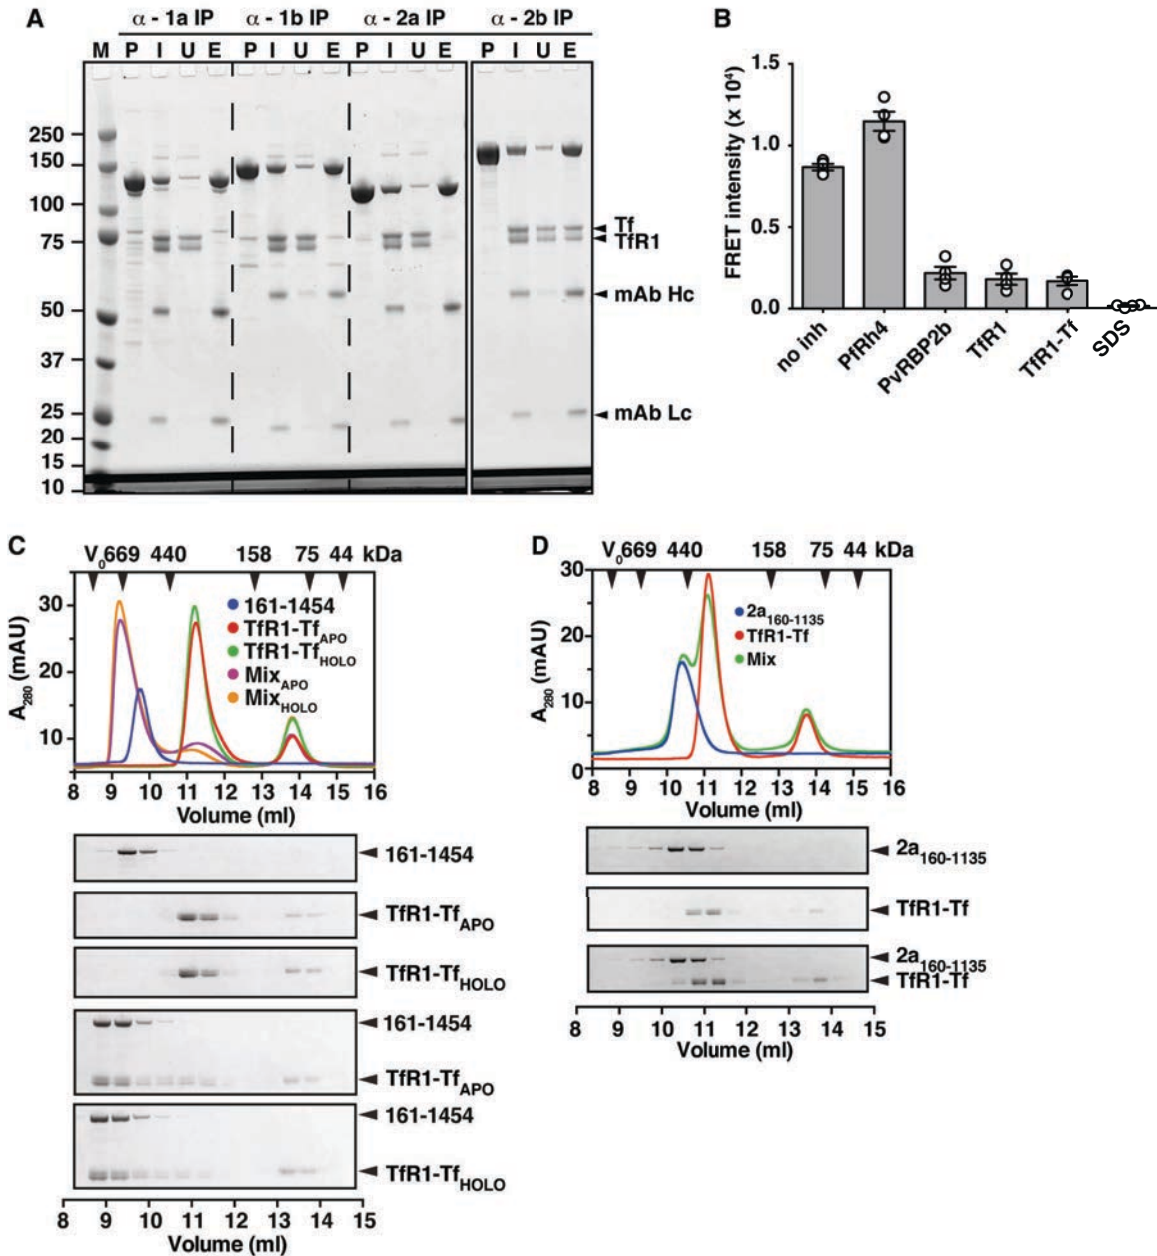

**Figure S2. Specificity of the interaction between PvRBP2b and TfR1-Tf.** (A) PvRBP1a (117 kDa), PvRBP1b (133 kDa), PvRBP2a (114 kDa) and PvRBP2b (153 kDa) were immunoprecipitated with their respective mAbs in the presence of the binary complex TfR1-Tf. Molecular weight marker (M) labeled in kDa. Eluates were run under reducing conditions on a SDS-PAGE gel and stained with SimplyBlue SafeStain. Multiple bands in the lanes with PvRBP alone suggest protein degradation or contaminating proteins from the purification of these PvRBPs that may bind non-specifically. P, PvRBP alone. I, input. U, unbound. E, eluate. (B) Measured FRET fluorescence intensity of the interaction between PvRBP2b-Dylight488 and TfR1-Dylight594 incubated at 1:1 molar concentration (no inh) either in the presence of unlabeled proteins (PfRh4, PvRBP2b, TfR1 and binary complex TfR1-Tf) or SDS as a denaturant. The fluorescence intensity (FI) of DyLight-488 (donor) was measured with a

485/14-nm excitation filter and a 535/25-nm emission filter and DyLight-594 was measured with a 590/20-nm excitation filter and 615/9-nm emission filter. (C) The interaction between PvRBP2b and TfR1-Tf binary complex is similar in the presence of iron-depleted ( $Tf_{APO}$ ) and iron-loaded ( $Tf_{HOLO}$ ) form of human transferrin. The exclusion volume ( $V_0$ ) of the columns and the elution volumes of selected marker proteins are indicated with black arrowheads. Lower part: Coomassie-Blue stained SDS-PAGE gels of the fractions obtained from SEC. PvRBP2b<sub>161-1454</sub> was used in panels A, B and C. (D) PvRBP2a does not interact with the TfR1-Tf binary complex as analyzed by SEC.

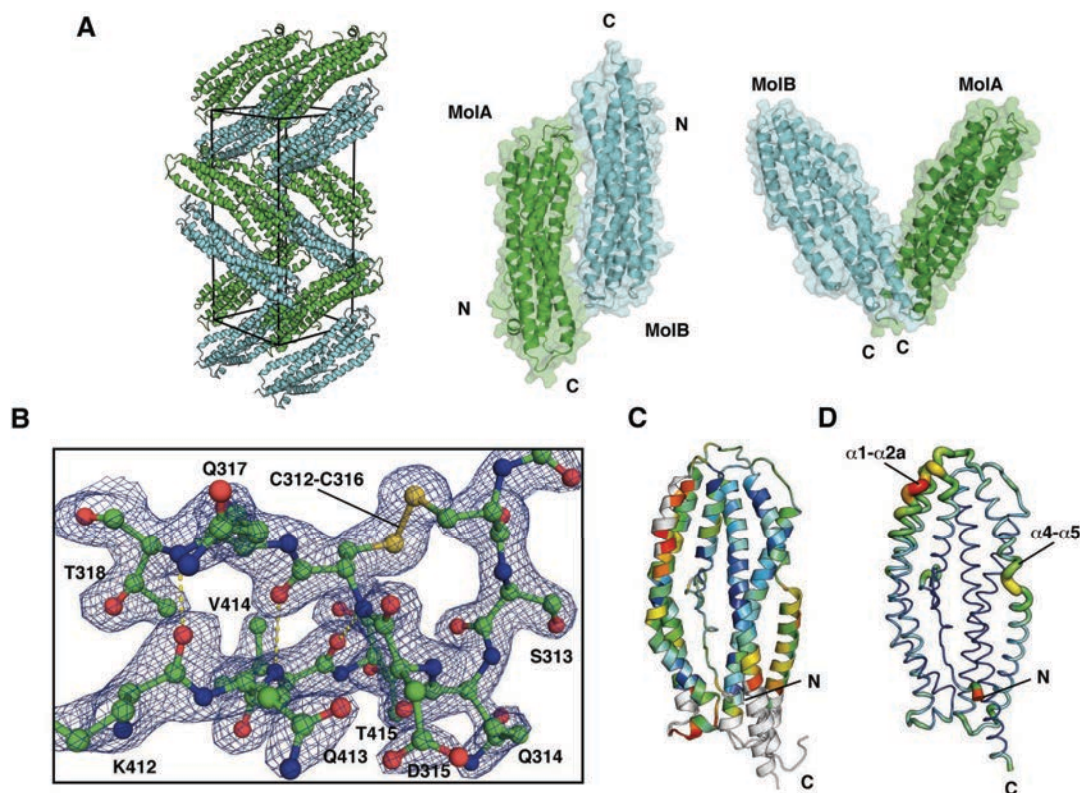

**Figure S3. Detailed analyses of PvRBP2b structure.** (A) Analysis of the packing of the molecules in the crystal. Left panel: General view of the crystal. Black lines represent the edges of the unit cell. Middle panel: Two molecules, MolA and MolB, present in the asymmetric unit can be seen in head-to-tail orientation. Both molecules consist of 301 residues spanning 169 to 470 amino acids of PvRBP2b and additionally include a dipeptide Gly-Ser fragment which was introduced as a cloning artifact. The buried interface area between two molecules present in the ASU is around  $719 \text{ \AA}^2$  as calculated using PISA server. Right panel: the most important crystal contact between molecules A and B from the neighboring asymmetric units buries around  $915 \text{ \AA}^2$  of the interface area. Molecules A and B are colored in green and cyan, respectively and shown as ribbon and surface representation. (B) Representative electron density around the disulphide bond formed between Cys312 and Cys316. The short beta-sheet formed between strands  $\beta$  and  $\beta'$  is also visible. The  $2F_{\text{obs}} - F_{\text{calc}}$  map is contoured at  $2\sigma$  and shown as blue mesh. Protein is shown in ball and stick representation with carbon shown in green, nitrogen in blue, oxygen in red and sulfur in yellow. The hydrogen bond network between strands  $\beta$  and  $\beta'$  is shown as yellow dashed line. (C) Superimposition of the two molecules from the asymmetric unit. Molecules are shown as ribbons colored with the colors corresponding to the RMSD between two molecules in the range from 0.01 to 0.46 Å. Dark blue shows good alignment, higher deviations are in orange/yellow/red. Residues not used for alignment are colored white. (D) Analysis of B-factors. The most flexible regions include a loop interconnecting helices #1 with #2a and helices #4 with #5. Molecule is shown as cartoon putty representation. The width of the structure as well as the colors changing from blue to red are proportional to the average residue temperature factor changing in the range from 18.45 to 98.65 Å<sup>2</sup>. The protein regions with high temperature factors are shown as wide orange/red tubes.

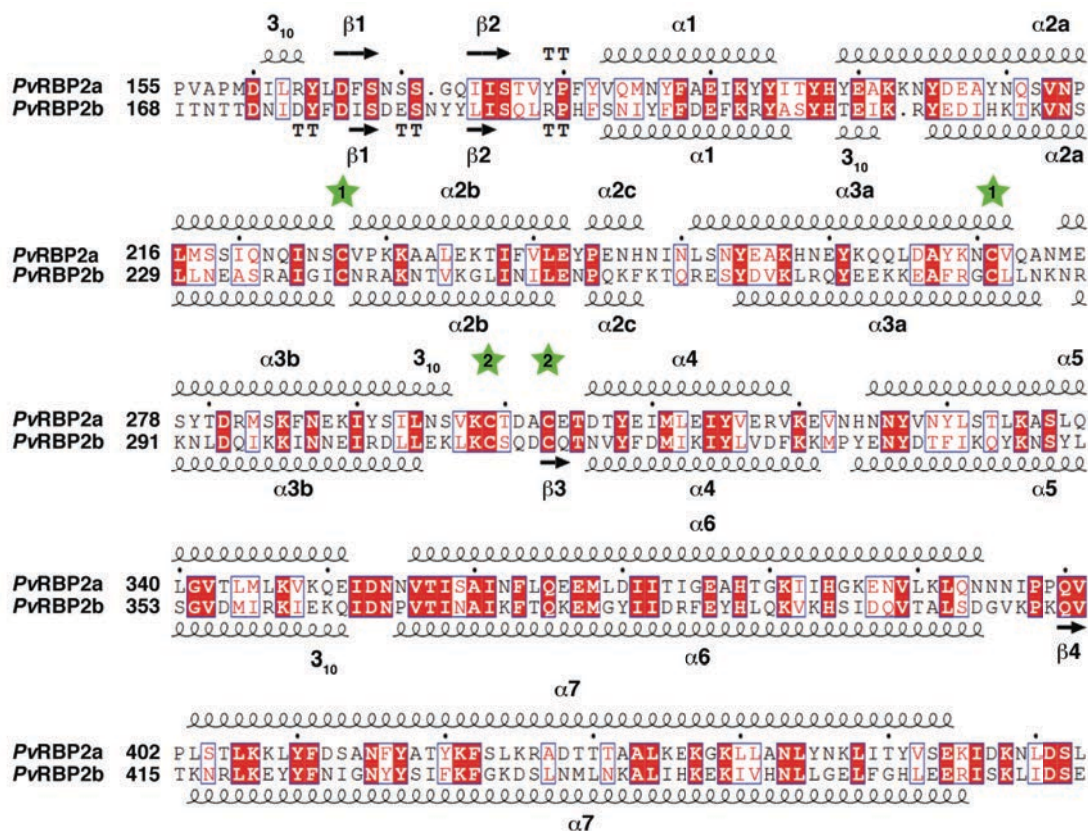

**Figure S4. Sequence alignment of the crystallized fragments of PvRBP2a and PvRBP2b.** The sequence alignment was generated using Clustal Omega and manually refined. The figure was prepared using ESPript3 (<http://espript.ibcp.fr/ESPript/ESPript>). The secondary structures of PvRBP2a and PvRBP2b are shown above and below the sequences, respectively. Identical residues are highlighted in red boxes whereas similar residues are colored red in white boxes. The positions of conserved cysteine residues are marked with green stars and labeled with corresponding numbers.

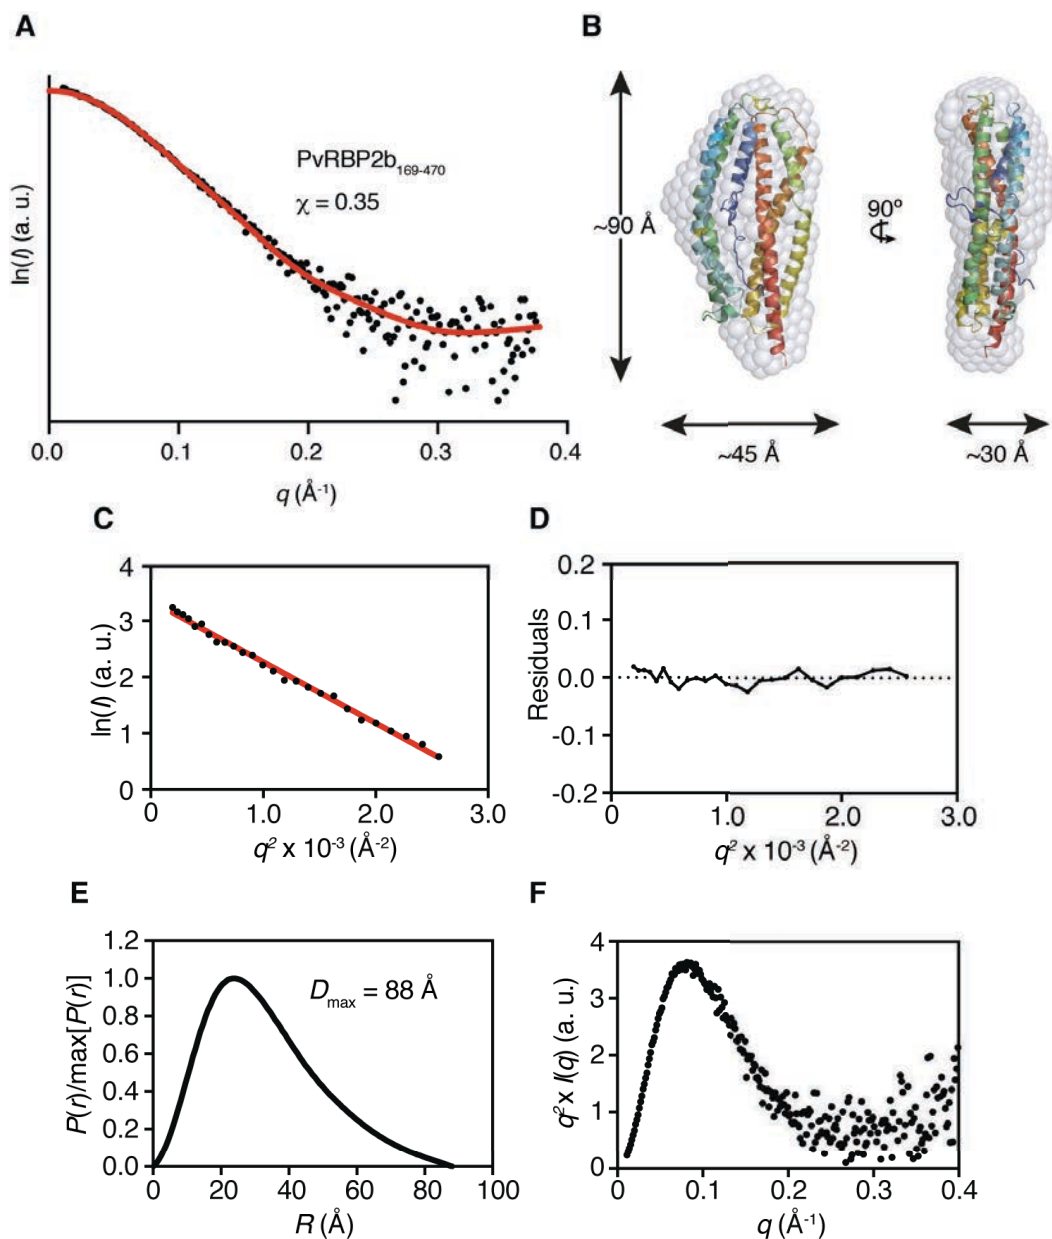

**Figure S5. Small angle X-ray scattering analysis of PvRBP2b<sub>169-470</sub>.** (A) Scattering intensity profile for PvRBP2b<sub>169-470</sub>. The background-subtracted SAXS data are shown as black circles representing natural logarithm of mean intensity  $\ln I(q)$  as a function of momentum transfer  $q$  in  $\text{\AA}^{-1}$  (a.u. - arbitrary unit). The theoretical scattering profile (red line) calculated from the crystal structure was fitted to the experimental scattering data of PvRBP2b<sub>169-470</sub> using CRY SOL with  $\chi$  value of 0.35. (B) Two orthogonal views of *ab initio* bead models of PvRBP2b<sub>169-470</sub> represented as grey spheres, superimposed with the crystal structure of the same construct. (C) Guinier plot for  $qR_g \ll 1.3$ . The radius of gyration and initial scattering intensity  $I(0)$  were approximated using the Guinier equation with PRIMUS. The values are presented in Table S2. (D) Residuals for the Guinier plot. (E) Pair-wise inter-atomic distance distribution function,  $P(r)$ . The  $R_g$  and maximum particle dimension  $D_{\max}$  calculated from the  $P(r)$  analysis are as indicated in Table S2. (F) Kratky plot analysis of the SAXS data.

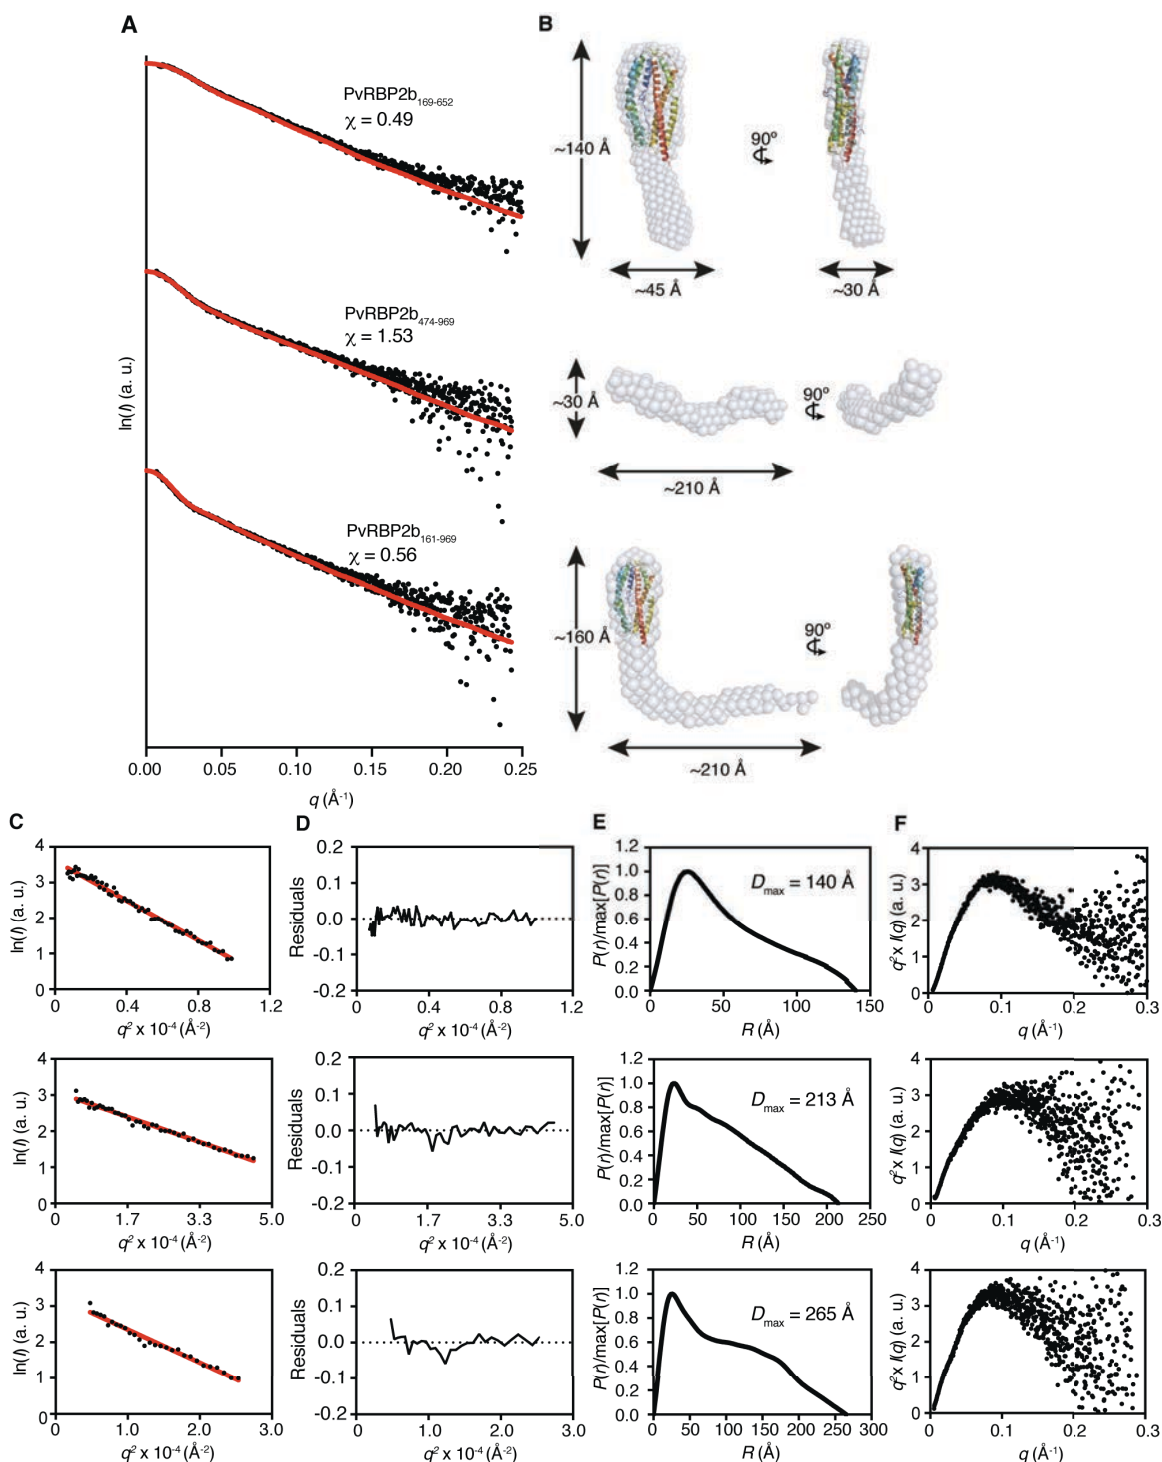

**Figure S6. Small angle X-ray scattering analysis of different constructs of PvRBP2b.** (A) Arbitrarily offset scattering intensity profiles from the apex of in-line size-exclusion column elution peaks for PvRBP2b<sub>169-652</sub> (top), PvRBP2b<sub>474-969</sub> (middle) and PvRBP2b<sub>161-969</sub> (bottom). The SAXS data are shown as black circles. Solid red line represents a calculated scattering pattern of an average *ab initio* model. The  $\chi$  value

indicating the fit of the average model to the experimental data was calculated using CRY SOL. **(B)** Two orthogonal views of *ab initio* bead models of PvRBP2b represented as grey spheres, superimposed with crystal structure of *P. vivax* PvRBP2b<sub>169-470</sub>: PvRBP2b<sub>169-652</sub> (top), PvRBP2b<sub>474-969</sub> (middle) and PvRBP2b<sub>161-969</sub> (bottom). **(C)** Guinier plots for  $qR_g \leq 1.3$ . **(D)** Residuals for the Guinier plot. **(E)** Pair-wise inter-atomic distance distribution function,  $P(r)$ . **(F)** Kratky plot analysis of the SAXS data.

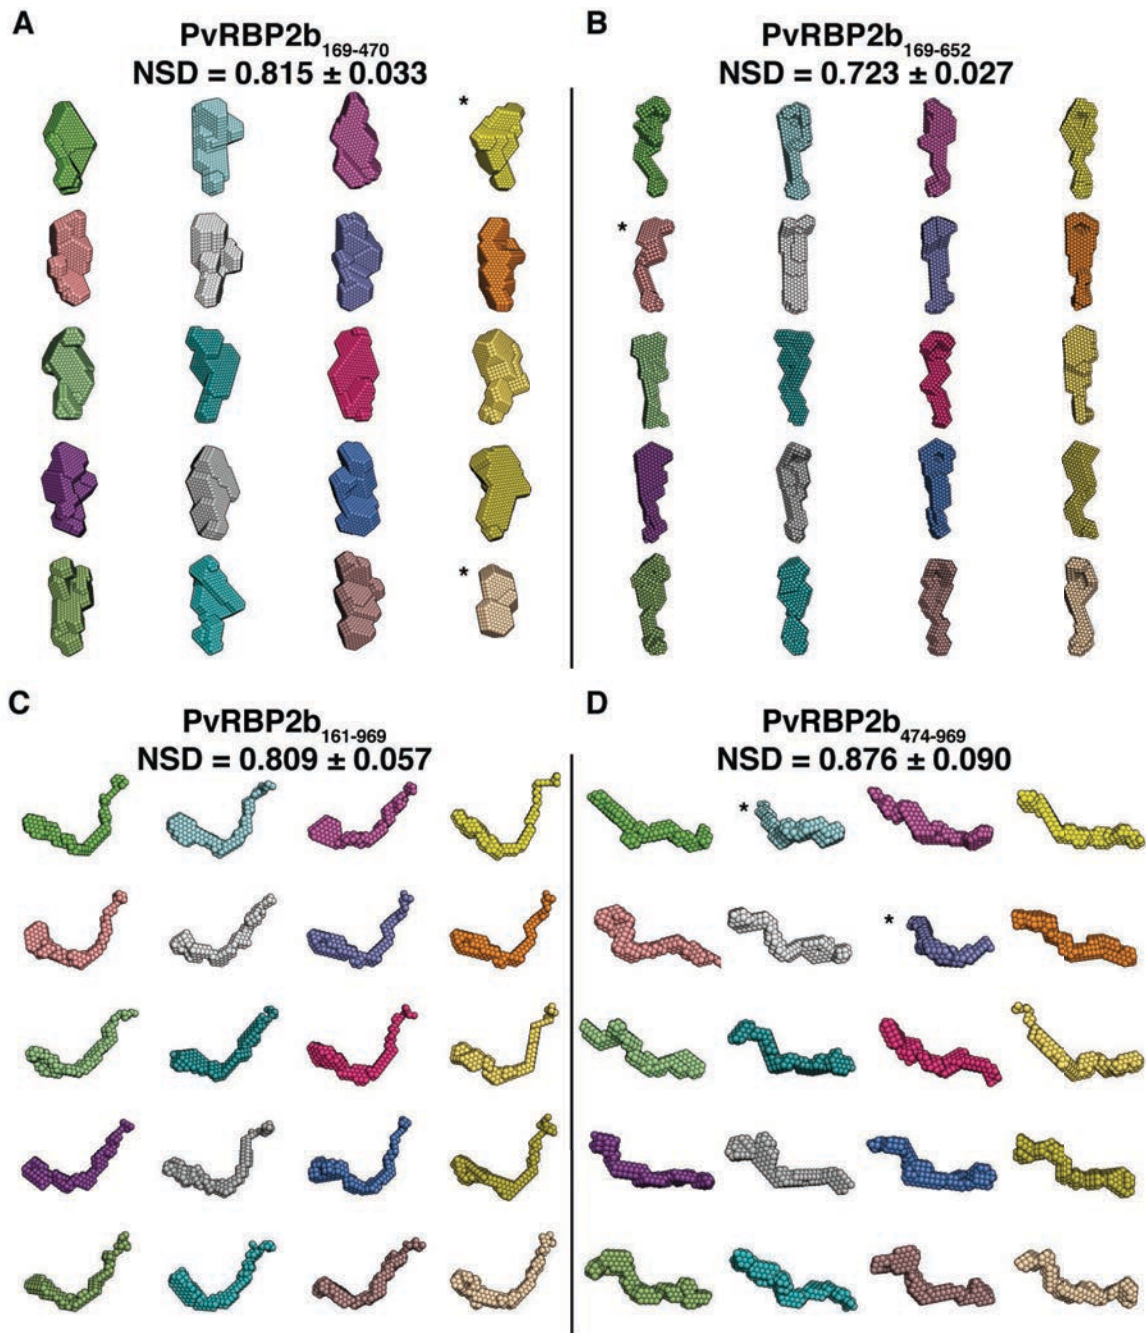

**Figure S7.** Twenty *ab initio* models generated using program DAMMIF based on SAXS data collected for each PvRBP2b fragment. (A) PvRBP2b<sub>169-470</sub>. (B) PvRBP2b<sub>169-652</sub>. (C) PvRBP2b<sub>161-969</sub>. (D) PvRBP2b<sub>474-969</sub>. \* indicates the models that were not included in averaging due to their normalized spatial discrepancy parameter NSD being higher than the mean value plus two times standard deviation.



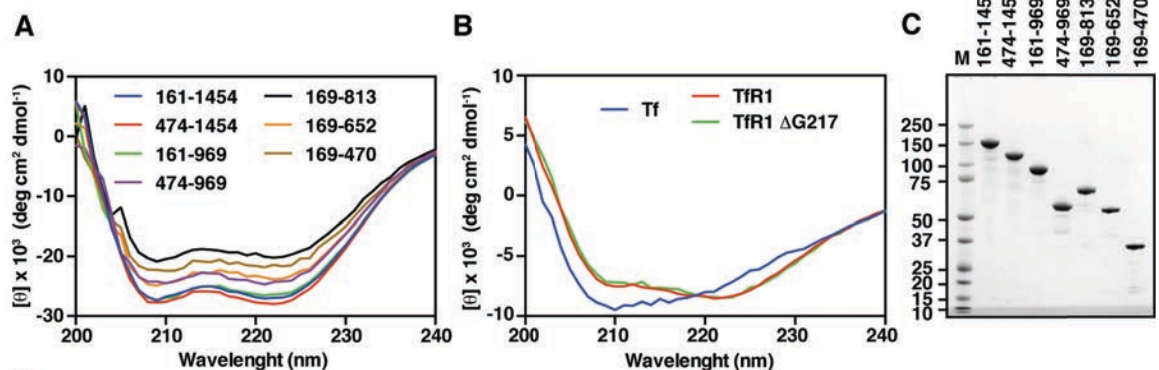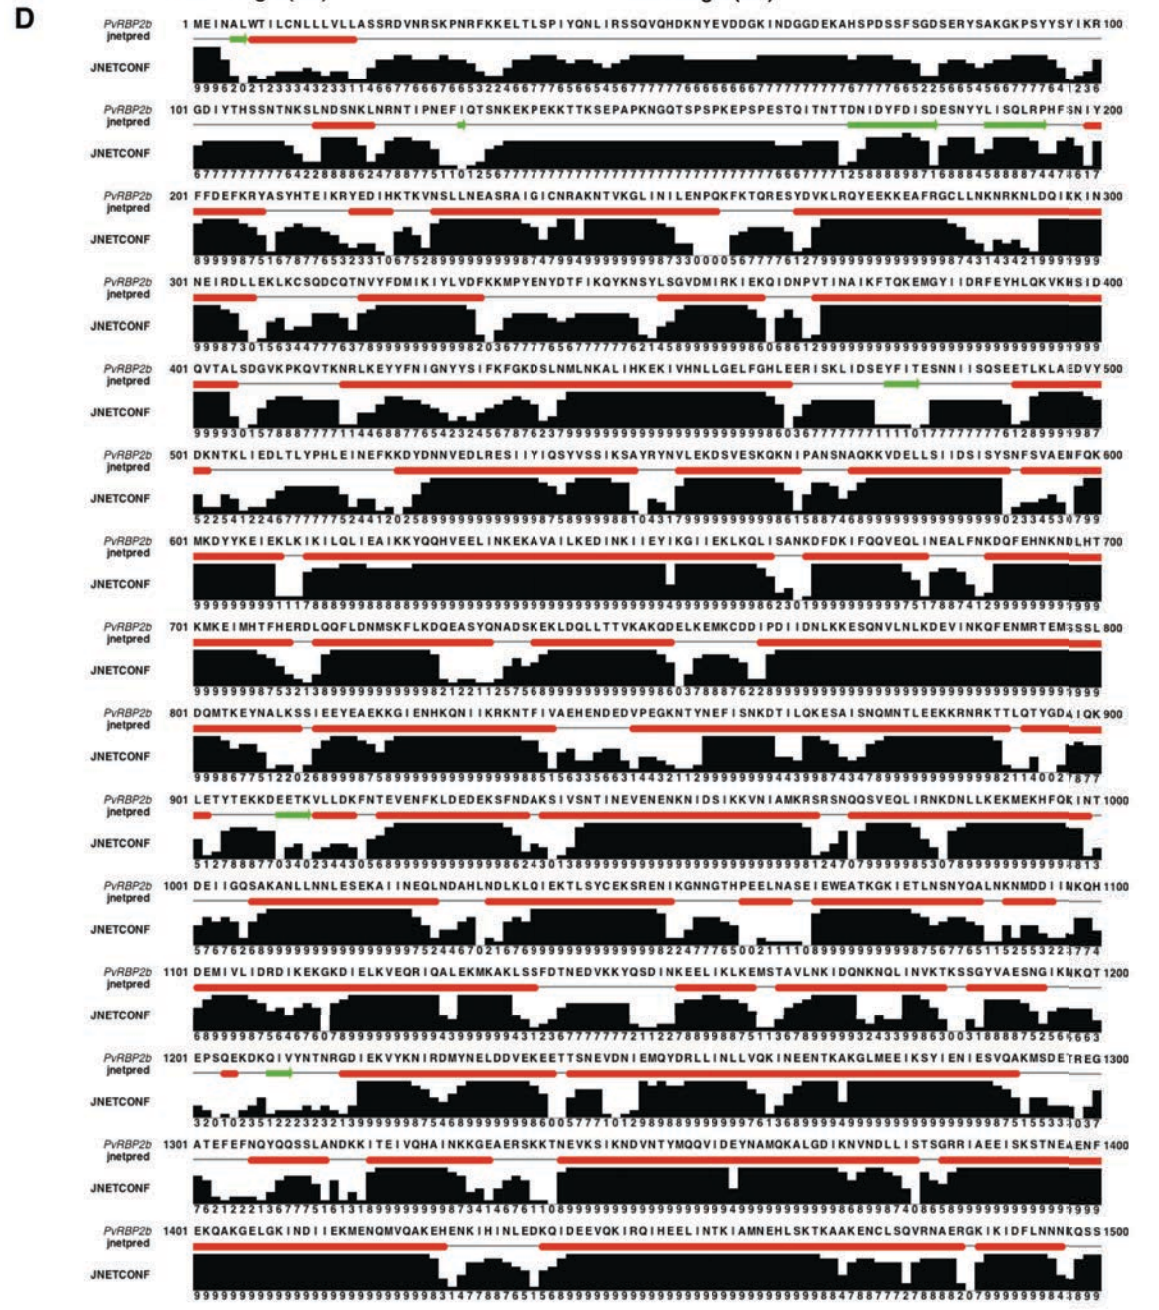

**Figure S8. Circular dichroism spectra of recombinant PvRBP2b variants, Tf and TfR1.** Circular dichroism spectra of recombinant PvRBP2b variants (**A**) and Tf, TfR1 and TfR1  $\Delta$ G217 mutant (**B**). The signal is presented as mean residue molar ellipticity ( $\theta$ ). (**C**) SDS-PAGE gel of purified PvRBP2b recombinant proteins. Two micrograms of each protein were loaded onto a 4-12% NuPAGE gradient gel under reducing conditions and stained with Coomassie Brilliant Blue. Molecular mass marker (M) indicated in kDa. (**D**) Secondary structures prediction for PvRBP2b (residues 1-1,500) obtained using JNet. JNetPRED represents the consensus prediction with helices marked as red tubes and sheets as green arrows. JNetCONF shows the confidence estimate for the prediction. High values mean high confidence.

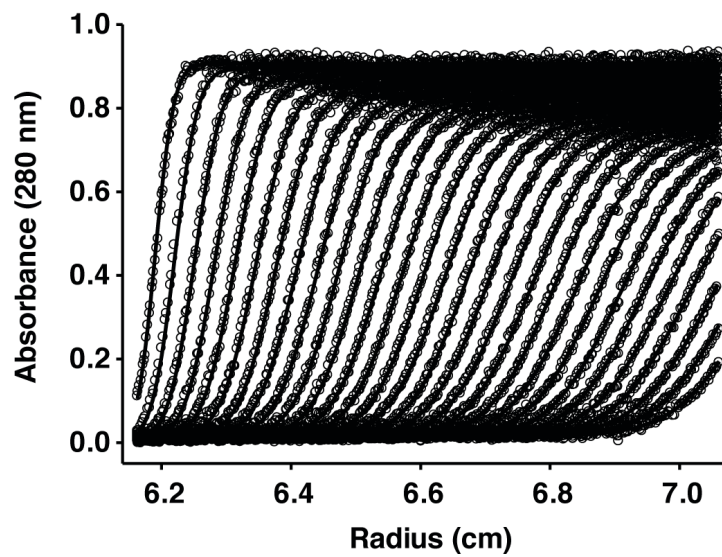

**Figure S9. Sedimentation velocity analysis of transferrin receptor-transferrin complex binding to PvRBP2b<sub>161-969</sub>.** Radial scans from the analytical ultracentrifuge are shown as circles, and the best fit to a continuous sedimentation coefficient distribution shown as solid lines.

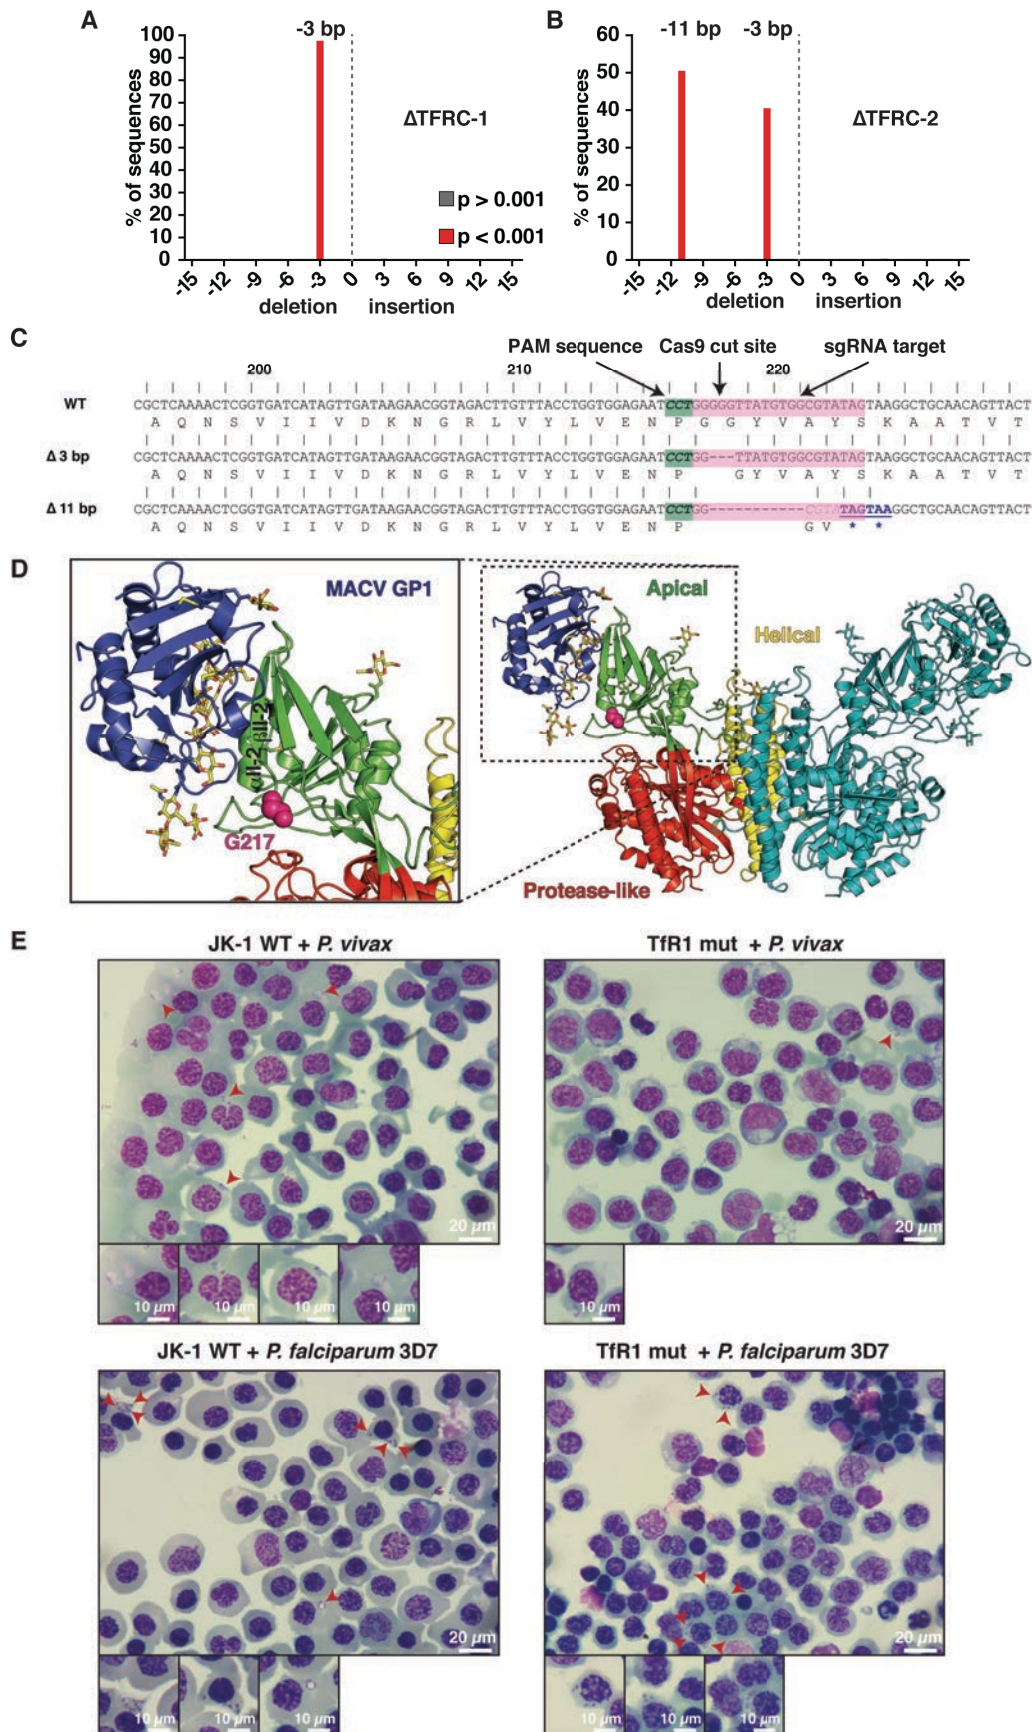

**Figure S10. Identification of TFRC mutations introduced by CRISPR/Cas9.** TIDE analysis of the two TFRC clones shows that  $\Delta$ TFRC-1 is homozygous for a -3 bp deletion (A) while  $\Delta$ TFRC-2 is a heterozygote, containing both a -3 bp and a -11 bp deletion (B). (C) The sgRNA target site (salmon) is shown along with the PAM sequences and the Cas9-cut site. The exact size and location of the -3 bp and -11 bp deletions are shown and have been identified from Sanger sequencing data. The -3 bp deletion results in the in-frame loss of Gly217, while the -11 bp deletion results in a premature stop codon. (D) The position of residue Gly217 (magenta spheres) mapped on the crystal structure of TfR1 ectodomain bound to MACV GP1 (PDB ID: 3KAS). The Gly217 mutation is localized in the loop lying in the close vicinity of helix  $\alpha$ II-2 and sheet  $\beta$ II-2 that are the main interaction sites with MACV GP1. The particular domains in one monomer of TfR1 are colored with protease-like domain shown in red, helical domain in yellow and the apical domain in green. The other molecule of TfR1 is shown in cyan. MACV GP1 is shown in blue. N-linked glycan moieties decorating the surface of both proteins are shown as sticks. (E) Light microscopy images of parasite invasion. Invasion of *P. vivax* into JK-1 WT (top left) and TfR1 mut cells (top right) and invasion of *P. falciparum* 3D7 into JK-1 WT (bottom left) and TfR1 mut cells (bottom right). Parasitized cells are indicated by red arrows. Insets show close-up views of infected cells.

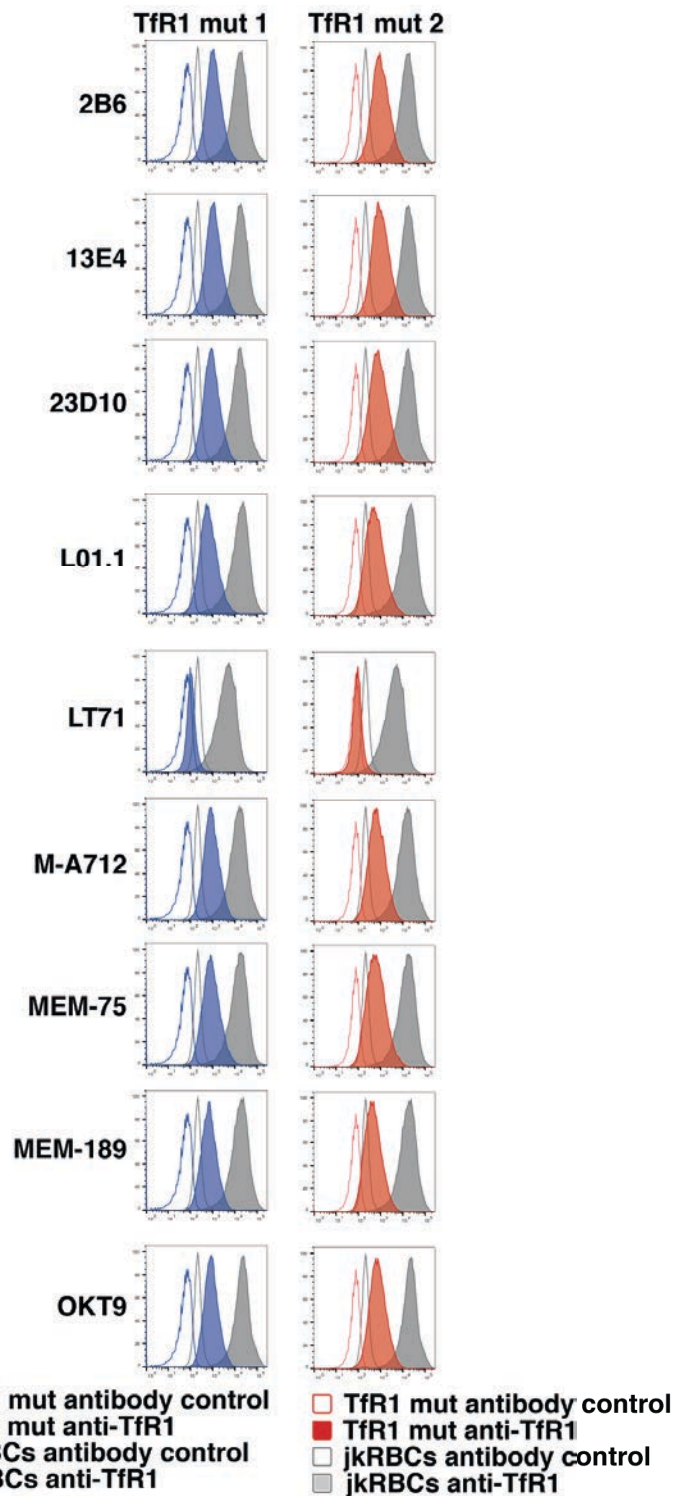

**Figure S11.** Expression of Tfr1 on the surface of jkRBC and Tfr1 mutant cells as measured by flow cytometry using nine anti-Tfr1 monoclonal antibodies as indicated. The antibody control reflects the staining of the secondary antibody alone.

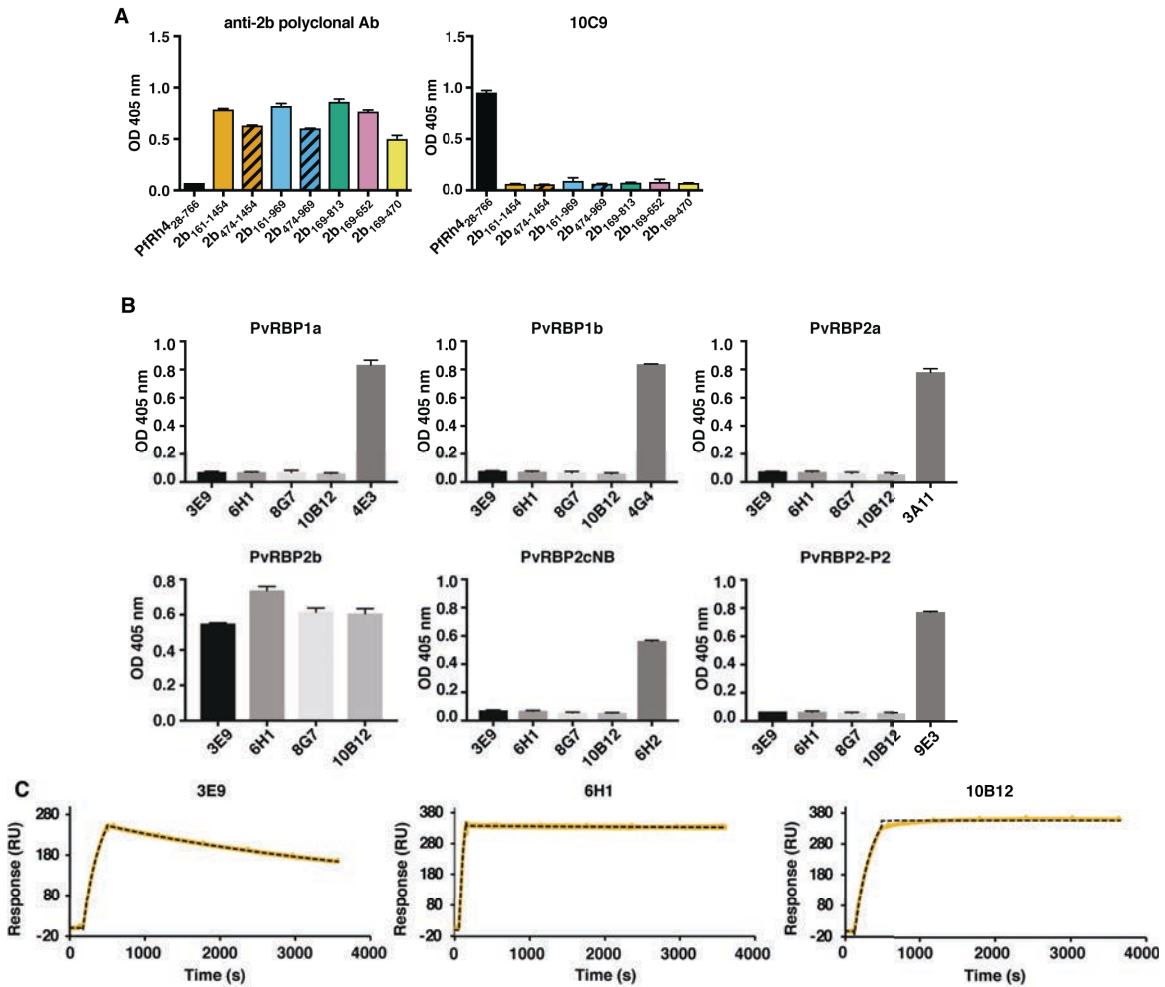

**Figure S12. Detection of recombinant PvRBP2b fragments by ELISA.** (A) ELISA plates were coated with equimolar concentrations of each recombinant fragment and detection with anti-PvRBP2b rabbit polyclonal antibody (left) and anti-PfRh4 mAb 10C9 (right) are shown. Representative plot of  $n=3$  is shown and error bars represent range of duplicate measurement per experiment. (B) ELISA plates were coated with equimolar concentrations of each recombinant fragment (top label) and detection with primary monoclonal antibodies against PvRBP1a (4E3), PvRBP1b (4G4), PvRBP2a (3A11), PvRBP2b (3E9, 6H1, 8G7 and 10B12), PvRBP2cNB (6H2) and PvRBP2-P2 (9E3) are shown. Representative plot of  $n=2$  is shown and error bars represent range of duplicate measurement per experiment. (C) Interaction between anti-PvRBP2b monoclonal antibodies and PvRBP2b measured by SPR. PvRBP2b<sub>161-1454</sub> was immobilized via standard amine coupling onto carboxymethyl dextran sensorchips and 3E9, 6H1 and 10B12 mAbs were flown over the surfaces at the concentrations 40, 52 and 40 nM, respectively. The binding curves were fit to a bivalent (2:1) interaction model. Sensorgrams of the interaction are displayed in yellow and the fitted curves are displayed as black dashes; RU - resonance units.

**Table S1. Crystallographic data collection and refinement statistics.**

| PvRBP2b <sub>169-470</sub>          |                             |
|-------------------------------------|-----------------------------|
| Data collection statistics          |                             |
| Space group                         | <i>P</i> 1 2 <sub>1</sub> 1 |
| Unit-cell dimensions                |                             |
| a, b, c (Å)                         | 59.50, 124.20, 65.31        |
| α, β, γ (°)                         | 90.00, 97.75, 90.00         |
| Wavelength (Å)                      | 0.95370                     |
| Resolution (Å)                      | 34.87 - 1.71 (1.74 - 1.71)  |
| Number of unique reflections        | 100,494 (4,872)             |
| $R_{\text{merge}}^a$                | 0.11 (1.71)                 |
| $R_{\text{pim}}^b$                  | 0.04 (0.66)                 |
| $\langle I/\sigma I \rangle$        | 10.0 (1.2)                  |
| Completeness (%)                    | 99.4 (98.8)                 |
| Multiplicity                        | 7.4 (7.5)                   |
| $CC_{1/2}^c$                        | 0.996 (0.551)               |
| Wilson B-factor (Å <sup>2</sup> )   | 25.1                        |
| Refinement statistics               |                             |
| Resolution (Å)                      | 34.17 - 1.71 (1.80 - 1.71)  |
| Unique reflections                  | 100,440                     |
| $R_{\text{work}}^d$                 | 0.168 (0.273)               |
| $R_{\text{free}}^d$                 | 0.188 (0.305)               |
| Number of atoms                     | 5947                        |
| Protein                             | 5100                        |
| Ligand                              | 23                          |
| Solvent                             | 824                         |
| Average B-factors (Å <sup>2</sup> ) | 35.5                        |
| Protein                             | 33.8                        |
| Ligands                             | 54.1                        |
| Solvent                             | 45.3                        |
| R.m.s. deviations                   |                             |
| Bond lengths (Å)                    | 0.014                       |
| Bond angles (°)                     | 1.32                        |
| Ramachandran plot (%)               |                             |
| Most favored                        | 98.2                        |
| Allowed                             | 1.8                         |
| Outlier                             | 0                           |

Statistics for the highest-resolution shell are shown in parentheses.

Data were collected on a single crystal.

$$^a R_{\text{merge}} = \frac{\sum_{\text{hkl}} \sum_i |I_i(\text{hkl}) - \langle I(\text{hkl}) \rangle|}{\sum_{\text{hkl}} \sum_i I_i(\text{hkl})} \quad (80).$$

$$^b R_{\text{pim}} = \frac{\sum_{\text{hkl}} \{1/[N(\text{hkl}) - 1]\}^{1/2} \times \sum_j |I_j(\text{hkl}) - \langle I(\text{hkl}) \rangle|}{\sum_{\text{hkl}} \sum_j I_j(\text{hkl})} \quad (81).$$

<sup>c</sup>  $CC_{1/2}$  = Pearson correlation coefficient between independently merged halves of the data set (82).

<sup>d</sup>  $R_{\text{work}} = \frac{\sum_{\text{hkl}} |F_o(\text{hkl}) - F_c(\text{hkl})|}{\sum_{\text{hkl}} F_o(\text{hkl})}$ .  $R_{\text{free}}$  was calculated for a test set of reflections omitted from the refinement.



**Table S2. SAXS data collection and analysis statistics.**

| Data-collection parameters         |                                                                     |
|------------------------------------|---------------------------------------------------------------------|
| Instrument                         | Australian Synchrotron SAXS/WAXS beamline                           |
| Beam geometry                      | 120 $\mu\text{m}$ point source                                      |
| Wavelength ( $\text{\AA}$ )        | 1.033                                                               |
| Exposure time (s)                  | 2                                                                   |
| Protein concentration              | between 3.0 and 8.0 mg/ml via in-line gel filtration chromatography |
| Temperature ( $^{\circ}\text{C}$ ) | 16                                                                  |
| Software employed                  |                                                                     |
| Primary data reduction             | ScatterBrain (Australian Synchrotron)                               |
| Data processing                    | PRIMUS, GNOM                                                        |
| <i>Ab initio</i> modelling         | DAMMIF, DAMSEL, DAMSUP, DAMAVER, DAMFILT                            |
| Rigid-body modelling               | COLORES                                                             |
| 3D graphics representations        | MacPyMOL                                                            |

| Structural parameters                    | PvRBP2b <sub>169-470</sub> | PvRBP2b <sub>169-652</sub> | PvRBP2b <sub>474-969</sub> | PvRBP2b <sub>161-969</sub> |
|------------------------------------------|----------------------------|----------------------------|----------------------------|----------------------------|
| $I(0)$ ( $\text{cm}^{-1}$ ) from $P(r)$  | $0.01316 \pm 0.00012$      | $0.01411 \pm 0.00012$      | $0.01143 \pm 0.00006$      | $0.01231 \pm 0.00007$      |
| $R_g$ ( $\text{\AA}$ ) from $P(r)$       | $25.96 \pm 0.32$           | $43.79 \pm 0.42$           | $63.99 \pm 0.40$           | $82.03 \pm 0.49$           |
| $D_{\text{max}}$ ( $\text{\AA}$ )        | $88 \pm 2$                 | $140 \pm 3$                | $213 \pm 5$                | $265 \pm 7$                |
| $I(0)$ ( $\text{cm}^{-1}$ ) from Guinier | $0.013 \pm 0.001$          | $0.014 \pm 0.001$          | $0.011 \pm 0.001$          | $0.012 \pm 0.001$          |
| $R_g$ ( $\text{\AA}$ ) from Guinier      | $25.40 \pm 0.52$           | $41.3 \pm 0.80$            | $60.60 \pm 0.61$           | $81.40 \pm 1.00$           |

**Table S3. List of the oligonucleotides used in this study to create different variants of PvRBP2b protein.**

| Oligonucleotide | Construct                   | Vector     | Sequence                                                                           |
|-----------------|-----------------------------|------------|------------------------------------------------------------------------------------|
| JG125           | PvRBP2b <sub>169-470</sub>  | pPROEX HTb | AAC CTG TAT TTT CAG GGC GCC ATG GGA TCC<br>ACC AAT ACC ACC GAT AAC ATC GAT         |
| JG126           |                             |            | GCC AAG CTT GGT ACC GCA TGC CTC GAG TCA<br>GCT AAT ACG TTC TTC CAG ATG ACC         |
| JG125           | PvRBP2b <sub>169-652</sub>  | pPROEX HTb | AAC CTG TAT TTT CAG GGC GCC ATG GGA TCC<br>ACC AAT ACC ACC GAT AAC ATC GAT         |
| JG213           |                             |            | GCC AAG CTT GGT ACC GCA TGC CTC GAG TCA<br>ATA TTC GAT AAT TTT GTT AAT ATC TTC TTT |
| JG125           | PvRBP2b <sub>169-813</sub>  | pPROEX HTb | AAC CTG TAT TTT CAG GGC GCC ATG GGA TCC<br>ACC AAT ACC ACC GAT AAC ATC GAT         |
| JG215           |                             |            | GCC AAG CTT GGT ACC GCA TGC CTC GAG TCA<br>GCT GGA CTT CAG GGC ATT ATA TTC TTT GGT |
| JG51            | PvRBP2b <sub>161-969</sub>  | pET-32a(+) | TAA TAC GAC TCA CTA TAG GGG                                                        |
| JG159           |                             |            | TTG TTC AAC GCT CTG CTG ATT GCT TCA GCT<br>ACG TTT CAT GGC AAT ATT CAC TTT         |
| JG160           | PvRBP2b <sub>474-969</sub>  | pET-32a(+) | CTG TAT TTT CAG GGC GCC ATG GGA TCC GAT<br>AGC GAG TAT TTT ATC ACC GAA AGC         |
| JG159           |                             |            | TTG TTC AAC GCT CTG CTG ATT GCT TCA GCT<br>ACG TTT CAT GGC AAT ATT CAC TTT         |
| JG160           | PvRBP2b <sub>474-1454</sub> | pET-32a(+) | CTG TAT TTT CAG GGC GCC ATG GGA TCC GAT<br>AGC GAG TAT TTT ATC ACC GAA AGC         |
| JG161           |                             |            | GCT TTC GGT GAT AAA ATA CTC GCT ATC GGA<br>TCC CAT GGC GCC CTG AAA ATA CAG         |
| JG71            | PvRBP2b <sub>161-1454</sub> | PET-32a(+) | GGT TCT GAA AAC CTG TAT TTT CAG GGC GCC<br>AAC ATC GAT TAC TTC GAT ATT TCC         |
| JG73            |                             |            | GCT TTG TTA GCA GCC GGA TCT CAG TCA TGC<br>CTG TTT TTC AAA GTT TTC GG              |

**Table S4. Molecular weights and absorption coefficients for the proteins used in this study.**

| Protein name                | MW (kDa)           | $A_{280}$ 0.1% | $\epsilon_{280}$ ( $M^{-1}cm^{-1}$ ) | Source   |
|-----------------------------|--------------------|----------------|--------------------------------------|----------|
| PvRBP2b <sub>169-470</sub>  | 36.46              | 0.868          | 31,540                               | ExPASy   |
| PvRBP2b <sub>169-652</sub>  | 57.88              | 0.880          | 50,910                               | ExPASy   |
| PvRBP2b <sub>169-813</sub>  | 76.89              | 0.701          | 53,890                               | ExPASy   |
| PvRBP2b <sub>161-969</sub>  | 96.68              | 0.619          | 59,850                               | ExPASy   |
| PvRBP2b <sub>161-1454</sub> | 152.9              | 0.545          | 83,355                               | ExPASy   |
| PvRBP2b <sub>474-969</sub>  | 58.73              | 0.482          | 28,310                               | ExPASy   |
| PvRBP2b <sub>474-1454</sub> | 114.9              | 0.451          | 51,815                               | ExPASy   |
| Tf                          | 79.60 <sup>a</sup> | 1.305          | 103,900                              | (45)     |
| (TfR1) <sub>2</sub>         | 156.6 <sup>b</sup> | 1.198          | 187,580                              | (43)     |
| (TfR1-Tf) <sub>2</sub>      | 315.8 <sup>c</sup> | 1.252          | 395,380                              | (43, 45) |

<sup>a</sup>Theoretical MW = 77.06 kDa. The value in the table was obtained using mass spectrometry and reflects glycosylation of the protein.

<sup>b</sup>Theoretical MW<sub>monomer</sub> = 73.82 kDa. The value in the table was obtained using mass spectrometry and reflects glycosylation of the protein. The protein forms a homodimer.

<sup>c</sup>The proteins form a 2:2 complex.

**Table S5. Analytical size exclusion chromatography.**

(A) Molecular weights of high- and mid-mass molecular mass markers used for the calibration of the analytical size exclusion column. (B) Experimental molecular weights for the particular proteins.

**A**

| Protein name       | MW <sup>a</sup> (Da) | log <sub>10</sub> MW | V <sub>e</sub> <sup>b</sup> (ml) | K <sub>av</sub> <sup>c</sup> |
|--------------------|----------------------|----------------------|----------------------------------|------------------------------|
| aprotinin          | 6,500                | 3.8129               | 19.51                            | 0.7334                       |
| ribonuclease       | 13,700               | 4.1367               | 17.82                            | 0.6221                       |
| carbonic anhydrase | 29,000               | 4.4624               | 16.41                            | 0.5293                       |
| ovalbumin          | 44,000               | 4.6435               | 15.06                            | 0.4404                       |
| conalbumin         | 75,000               | 4.8751               | 14.24                            | 0.3864                       |
| aldolase           | 158,000              | 5.1987               | 12.81                            | 0.2923                       |
| ferritin           | 440,000              | 5.6435               | 10.55                            | 0.1435                       |
| thyroglobulin      | 669,000              | 5.8254               | 9.24                             | 0.0573                       |

**B**

| Protein name                                        | V <sub>e</sub> <sup>a</sup> (ml) | K <sub>av</sub> <sup>b</sup> | Calculated MW (kDa) | Theoretical MW (kDa) |
|-----------------------------------------------------|----------------------------------|------------------------------|---------------------|----------------------|
| PvRBP2b <sub>169-470</sub>                          | 16.21                            | 0.5161                       | 29.67               | 36.46                |
| PvRBP2b <sub>161-969</sub>                          | 11.36                            | 0.1968                       | 280.0               | 96.68                |
| PvRBP2b <sub>474-969</sub>                          | 12.27                            | 0.2567                       | 183.8               | 58.73                |
| PvRBP2b <sub>161-1454</sub>                         | 9.69                             | 0.0869                       | 606.6               | 152.9                |
| PvRBP2b <sub>474-1454</sub>                         | 10.04                            | 0.1099                       | 515.9               | 114.9                |
| Tf                                                  | 13.76                            | 0.3548                       | 92.21               | 79.60                |
| (TfR1) <sub>2</sub>                                 | 13.49                            | 0.3371                       | 104.5               | 156.6                |
| (TfR1-Tf) <sub>2</sub>                              | 11.21                            | 0.1870                       | 300.2               | 315.8                |
| (PvRBP2b <sub>161-969</sub> -TfR1-Tf) <sub>2</sub>  | 10.10                            | 0.1139                       | 501.8               | 509.2                |
| (PvRBP2b <sub>161-1454</sub> -TfR1-Tf) <sub>2</sub> | 9.11                             | 0.0487                       | 793.4               | 621.6                |

<sup>a</sup>MW – molecular weight<sup>b</sup>V<sub>e</sub> – elution volume

<sup>c</sup>K<sub>av</sub> = (V<sub>e</sub> - V<sub>0</sub>)/(V<sub>c</sub> - V<sub>0</sub>), partition coefficient, where V<sub>0</sub> = 8.37 ml, column void volume obtained using a sample of blue dextran 2000 and V<sub>c</sub> = 23.56 ml, geometric column volume. K<sub>av</sub> = -0.3275 x log<sub>10</sub>MW + 1.9808, R<sup>2</sup> = 0.9971.

**Table S6. SPR measurements of mAbs-PvRBP2b interactions.**

| mAb   | $k_{a1}$<br>( $M^{-1}s^{-1}$ ) | $k_{d1}$<br>( $s^{-1}$ ) | $K_{D1}$<br>(M)       | $k_{a2}$<br>([signal] $^{-1}s^{-1}$ ) | $k_{d2}$<br>( $s^{-1}$ ) | $K_{D2}$<br>(M)      | $\chi^2$<br>([signal] $^2$ ) | $R_{max}$<br>(calculated) |
|-------|--------------------------------|--------------------------|-----------------------|---------------------------------------|--------------------------|----------------------|------------------------------|---------------------------|
| 3E9   | $7.1 \times 10^4$              | $3.7 \times 10^{-4}$     | $5.2 \times 10^{-9}$  | $5.8 \times 10^{-2}$                  | $7.2 \times 10^0$        | $1.2 \times 10^2$    | 1.6                          | 541                       |
| 6H1   | $1.6 \times 10^5$              | $4.9 \times 10^{-4}$     | $3.0 \times 10^{-9}$  | $8.1 \times 10^{-3}$                  | $1.3 \times 10^2$        | $1.6 \times 10^0$    | 5.3                          | 848                       |
| 10B12 | $5.5 \times 10^4$              | $4.9 \times 10^{-7}$     | $8.8 \times 10^{-12}$ | $2.3 \times 10^{-1}$                  | $5.4 \times 10^{-3}$     | $2.4 \times 10^{-2}$ | 36                           | 898                       |

The binding curves obtained from the experiment were fit to a bivalent (2:1) interaction model to estimate affinity constants for the bivalent interaction.

## Additional Database

**Dataset S1. Quantitative surface proteomics analysis comparing WT jkRBCs and TfR1 mut1 and TfR1 mut2 jkRBC lines.** For each protein, the following data fields are shown: UniProt ID; Gene Symbol; Description, Gene Ontology Cellular Compartment-term classification: M – membrane, PM – plasma membrane, IPM – integral to plasma membrane, CS – cell surface, XC – extracellular, Nuc – nuclear, ShG – short GO) (**52, 83**); number of identified peptides, fold change (FC) of average jkRBC signal:noise (S:N) compared to the average TfR1 Mut-1/2 (S:N); normalized S:N for each protein. The “No\_Filter” worksheet includes all identified proteins and the “PM\_CS\_XC\_ShG\_2\_peptides” worksheet shows the subset of plasma membrane proteins.
